# Supplementary material for: A circuit-dependent ROS feedback loop mediates glutamate excitotoxicity to sculpt the Drosophila motor system
Source: eLife. 2019 Jul 18;8:e47372. doi: 10.7554/eLife.47372 (PMC6682402; doi:10.7554/eLife.47372)
Supplement: Figure 1—figure supplement 1—source data 1. [file elife-47372-fig1-figsupp1-data1.xlsx]

## Sheet: 工作表1
Figure 1-figure supplement 1 Panel D (Normalized Eaat1 immunostaining intensity)
control (w1118)	eaat1hypo/hypo	eaat1hypo/SM2
0.893078	0.121596	0.0884852
0.730428	0.158067	0.104989
0.738282	0.169324	0.115787
1.16145	0.149836	0.0961129
1.28295	0.149012	0.0512189
1.19382	0.14907	0.0899713
