# Supplementary material for: A circuit-dependent ROS feedback loop mediates glutamate excitotoxicity to sculpt the Drosophila motor system
Source: eLife. 2019 Jul 18;8:e47372. doi: 10.7554/eLife.47372 (PMC6682402; doi:10.7554/eLife.47372)
Supplement: Figure 1—figure supplement 2—source data 1. [file elife-47372-fig1-figsupp2-data1.xlsx]

## Sheet: 工作表1
Figure 1-figure supplement 2 Panel A (Total presynaptic area of boutons in muscle 6 (μm2))			Figure 1-figure supplement 2 Panel B (Total active zone number in muscle 6)			Figure 1-figure supplement 2 Panel C (Surface area of muscle6/7 (mm2))
control (w1118)	eaat1hypo		control (w1118)	eaat1hypo		control (w1118)	eaat1hypo
878.297	669.879		914	799		74234.4	56020.5
691.445	792.807		862	730		72932.3	55568.6
628.664	618.459		878	823		64981.9	69064.3
896.775	938.265		712	574		59490.2	55668.1
497.259	636.832		680	726		53538.8	44240.4
691.831	790.154		665	806		50781.5	53829.9
512.36	649.472		799	657		58647.6	61565.8
786.5	721.694		759	905		45021.7	58433.2
			706	768		51761.9	65142.8
			939	960		52880.1	74280.4
			744	892		47798.2	59001.9
			525			51828.9	59271.9
			740			52954.8	55541.8
			726.9			53799.3	48374.5
						46116.9	53883.5
						65318.9	62519.4
						65328.5	59302.5
						51177.8	67812
						58885.1	39983.7
						60047.4	51758.1
						67203.1	45622.9
						73378.5	74889.3
						64348.1	83368.2
						75505.9	65336.2
						79781.7	65523.8
						70414.3	74623.1
						76913.3	72777.2
						65709.6	67469.3
						62553.9	77401.6
						65094.9	56443.7
						68645	59097.6
						83027.3	92339.2
						78726.6	84124.5
						76162.6	67143.8
						80524.6	60394
						92877.3	80662.5
