# Supplementary material for: A circuit-dependent ROS feedback loop mediates glutamate excitotoxicity to sculpt the Drosophila motor system
Source: eLife. 2019 Jul 18;8:e47372. doi: 10.7554/eLife.47372 (PMC6682402; doi:10.7554/eLife.47372)
Supplement: Figure 1—figure supplement 3—source data 1. [file elife-47372-fig1-figsupp3-data1.xlsx]

## Sheet: 工作表1
Figure 1-figure supplement 3 Panel A (Burst frequency (/min))											Figure 1-figure supplement 3 Panel B (Intra-burst spike density (/s))
control (w1118)	eaat1hypo	repo>eaat1-venus in eaat1hypo	alrm>eaat1-venus in eaat1hypo	nSyb>eaat1-venus in eaat1hypo	repo >hEAAT2-egfp in eaat1hypo	OK371>vglut-RNAi in eaat1hypo	tsh>eaat1-venus in eaat1hypo	gluRIIDe01443/+ in eaat1hypo	gluClαglc1/+ in eaat1hypo		control (w1118)	eaat1hypo	repo>eaat1-venus in eaat1hypo	alrm>eaat1-venus in eaat1hypo	nSyb>eaat1-venus in eaat1hypo	repo >hEAAT2-egfp in eaat1hypo	OK371>vglut-RNAi in eaat1hypo	tsh>eaat1-venus in eaat1hypo	gluRIIDe01443/+ in eaat1hypo	gluClαglc1/+ in eaat1hypo
7.1	3.3	8.6	5.4	4.5	2.1	3.3	2.3	1.1	2.3		18.73	18.4096	26.6857	22.0079	18.5169	14.3359	20.2076	10.2118	7.25381	12.7687
3.9	1.33333	2.8	2.8	4.2	4.7	3.5	1.2	2.4	1.8		16.8534	7.42954	18.2411	13.8382	20.1262	20.4905	12.5683	14.0861	7.09804	9.30015
4.7	1.52727	1.6	4.4	6.5	0.6	3.3	1.9	1.9	1.4		17.7477	3.13592	25.6088	14.8455	12.9009	11.6836	9.69257	10.4717	15.4808	7.74979
4.5	1.74545	4.5	1.9	4.3	2.9	2.4	1.9	1.2	1.57143		21.0291	3.54418	19.0588	19.57	14.8494	18.5632	14.2983	13.6799	8.45085	7.65567
4.4	1.26923	1.7	4	2.52	1.8	3.3	1.7	3	4.4		14.4088	4.96404	21.5685	16.8432	18.9037	14.9241	12.8122	13.4479	9.08735	10.549
2.7	2.5	7.8	5.6	4.61	5.1	3.9	3.3	2.6	2.6		22.211	9.42472	29.0287	13.8378	9.9621	16.8531	20.0326	16.0801	5.81039	11.8284
5.6	1.3	2.2	1.4	3.3	2.7	1.6	2.1	1.75	1.1		28.6995	8.17569	15.0955	11.1075	20.0852	27.1417	20.5946	7.5136	6.84506	9.8232
3.6	1.5	3.8		4.2	1.2		2	3.2	3.6		22.928	12.3383	16.5179		18.879	24.9363		14.1613	7.75849	13.9092
6.97681	0.9	4.9		6.1					2.4		25.6478	9.96213	17.8536		17.4593					7.52061
4.4	2.6								2.4		20.6099	6.39941								10.7204
1.7	1.8								4.6		29.8305	14.1163								11.133
3.2	0.6										27.3441	17.1585
5.6	1										23.6841	13.4532
4.9	0.6										23.6511	8.97313
	1.2											9.6862
	0.6											14.6748
	1.4											7.60842
