# Supplementary material for: A circuit-dependent ROS feedback loop mediates glutamate excitotoxicity to sculpt the Drosophila motor system
Source: eLife. 2019 Jul 18;8:e47372. doi: 10.7554/eLife.47372 (PMC6682402; doi:10.7554/eLife.47372)
Supplement: Figure 1—source data 1. [file elife-47372-fig1-data1.xlsx]

## Sheet: 工作表1
Figure 1 Panel C (normalized bouton number)			Figure 1 Panel D (Bouton Size (mm2))			Figure 1 Panel F (EJP amplitude (mV))			Figure 1 Panel G (Quantal content)			Figure 1 Panel H (mEJP amplitude (mV))			Figure 1 Panel J (Burst duration (s))			Figure 1 Panel K (> 15 s bursts (s/min))			Figure 1 Panel M (Locomotion (mm/min))
control (w1118)	eaat1hypo		control (w1118)	eaat1hypo		control (w1118)	eaat1hypo		control (w1118)	eaat1hypo		control (w1118)	eaat1hypo		control (w1118)	eaat1hypo		control (w1118)	eaat1hypo		control (w1118)	eaat1hypo
0.620005	0.927973		2.605	0.965		26.0662	32.1699		11.1994	18.2395		2.32746	1.76375		2.09575	9.56771		0	14.2062		64.3601	0.663637
0.726979	1.21984		3.281	4.824		25.5028	46.8441		18.8836	26.1452		1.35053	1.39471		3.84006	21.6707		0	20.9281		52.769	2.58037
0.735811	1.23073		0.724	0.579		24.2551	36.4649		16.126	33.2597		1.5041	1.71042		3.69842	34.8591		0	49.7972		64.1144	4.42692
0.753365	1.28347		10.083	4.583		33.5125	56.888		12.4589	15.5637		2.68983	2.31643		7.13086	10.491		0	10.2597		58.5384	13.9584
0.836993	1.43308		4.68	0.82		13.1291	36.0523		7.4388	17.9118		1.76495	1.91433		5.08684	32.7887		1.69484	33.4674		56.4704	2.66858
0.960424	1.49471		1.689	0.772		21.5184	34.2891		11.7594	23.8132		1.82989	1.5676		3.40004	14.4317		0	21.022		61.1444	1.52175
0.963456	1.51029		1.399	0.917			37.3296									6.91867			1.51713		55.1429	1.76435
0.99044	1.52222		11.772	4.632			31.0756									29.7847			40.1896		52.6317	9.68389
0.991365	1.55457		1.496	1.496												12.3177			6.76939		61.3617	2.99719
1.03365	1.55707		7.092	3.232																	44.0487	1.48555
1.03377	1.67094		8.732	10.421																	36.4933	2.00549
1.04026	1.71627		1.351	1.254																	32.3012	4.2057
1.10855	1.75834		1.737	2.846																	57.9325	6.0898
1.12646	2.10627		2.123	2.171																	40.2267	11.9376
1.13615	2.16441		1.592	11.531																	81.368	2.13593
1.22385			15.004	1.737																	64.4982	7.55775
1.29717			2.219	1.592																	55.8434
1.47784			2.268	1.785																	29.9136
			6.368	3.908																	25.0012
			3.184	3.715																	57.4514
			10.131	15.969
			2.412	2.268
			6.561	0.627
			15.294	7.092
			13.846	0.724
			1.64	2.026
			8.057	2.46
			8.105	5.838
			2.702	3.088
			10.131	1.785
			3.329	3.039
			11.675	2.316
			22.53	1.689
			8.925	7.43
			11.434	0.724
			17.175	9.987
			0.82	8.25
			2.364	1.544
			4.004	1.013
			10.855	2.075
			1.206	9.987
			5.645	2.364
			19.298	2.46
			3.474	2.268
			12.447	2.316
			2.364	0.965
			12.737	1.64
			13.412	1.351
			1.496	3.088
			1.93	13.798
			7.816	9.263
			14.618	6.561
			5.982	2.219
			17.127	16.355
			3.86	3.86
			5.017	9.987
			8.539	1.206
			2.026	1.013
			2.219	6.224
			19.732	1.399
			6.658	1.882
			16.162	2.702
			11.096	0.82
			7.478	0.772
			4.149	2.123
			6.513	2.846
			23.399	8.636
			2.171	5.789
			10.952	13.75
			5.886	1.496
			13.702	1.689
			2.171	3.088
			4.776	0.772
			3.618	1.013
			16.307	3.039
			11.241	3.136
			1.689	1.592
			13.75	4.776
			17.995	3.425
			3.667	8.153
			4.197	2.316
			24.653	2.702
			13.364	2.075
			1.158	1.882
			1.399	2.171
			31.263	1.785
			26.052	1.303
			19.25	7.864
			7.478	3.039
			12.447	1.206
			1.303	0.965
			9.311	1.978
			9.167	1.737
			21.71	1.882
			17.272	8.829
			4.39	1.544
			2.316	4.197
			8.588	4.583
			5.838	3.474
			10.276	10.759
			2.412	4.873
			5.452	4.68
			1.882	5.355
			7.478	3.522
			11	7.285
			7.574	5.21
			3.86	5.259
			3.86	24.364
			10.276	6.561
			9.07	5.789
			9.601	4.728
			16.596	5.403
			15.873	11.338
			2.605	2.75
			5.982	3.811
			3.908	9.552
			2.895	12.254
			1.882	1.785
			2.026	1.061
			3.522	0.965
			4.583	2.653
			7.43	1.978
			14.956	2.895
			11.965	0.82
			15.728	3.281
			2.75	4.053
			8.395	3.474
			2.268	8.202
			7.381	8.009
			1.833	1.399
			2.46	1.11
			6.031	1.447
			5.5	6.61
			2.268	3.522
			4.246	1.158
			6.224	2.026
			5.934	3.57
			6.32	20.986
			5.162	1.785
			14.859	1.303
			12.447	1.833
			2.943	22.723
			7.816	9.552
			1.544	1.11
			3.281	1.061
			6.368	9.987
			9.649	2.075
			3.184	3.908
			2.557	1.447
			7.719	3.425
			13.171	1.447
			3.425	3.281
			7.623	5.066
			6.224	5.886
			3.522	14.184
			0.724	4.149
			4.969	4.246
			3.908	7.671
			19.25	7.96
			1.689	8.781
			5.259	9.311
			1.978	12.544
			14.859	6.224
			4.68	4.68
			3.667	7.333
			2.219	2.123
			1.11	4.101
			2.026	13.123
			1.447	2.509
			7.912	5.259
			0.724	2.75
			2.605	7.044
			8.153	4.632
			3.039	4.776
			5.017	2.605
			1.303	2.943
			0.579	11.772
			1.206	6.658
			11.675	2.364
			6.272	6.224
			4.39	2.46
			15.39	8.443
			3.86	2.557
			3.86	1.689
			1.496	5.693
			8.346	3.329
			22.53	4.68
			24.315	10.662
			1.592	11.434
			1.399	9.118
			2.171	14.473
			2.268	1.882
			10.324	1.206
			3.425	2.075
			4.921	7.381
			30.25	11.675
			18.285	5.114
			15.969	7.285
			11.193	1.399
			9.987	11.145
			2.702	10.469
			11.579	10.566
			2.026	7.14
			16.837	4.439
			16.789	2.846
			2.991	4.342
			8.974	8.829
			2.123	4.246
			0.772	1.206
			3.039	1.833
			2.557	2.075
			8.298	0.531
			8.395	2.75
			1.64	0.868
			13.074	2.605
			1.592	7.333
			3.667	0.868
			6.754	0.82
			20.552	0.965
			5.982	0.579
			2.412	3.86
			1.351	0.917
			1.544	1.399
			12.351	0.724
			6.513	1.64
			10.662	2.557
			28.127	1.737
			0.579	3.329
			12.785	5.403
			1.351	13.46
			0.82	0.724
			10.614	1.351
			3.039	2.026
			3.956	8.298
			6.706	0.724
			2.123	1.351
			10.903	2.46
			10.759	0.531
			11.723	1.254
			14.377	0.917
			7.092	1.206
			3.811	0.579
			1.833	3.715
			0.724	2.075
			1.061	0.724
			8.829	12.881
			1.592	15.969
			1.061	1.833
			4.246	0.772
			10.324	3.425
			5.259	4.149
			1.833	1.93
			9.745	4.487
			6.031	1.303
			1.93	0.82
			5.789	0.482
			13.316	0.338
			2.026	0.675
			1.11	1.303
			2.991	1.785
			3.57	8.346
			17.706	11.193
			1.689	5.355
			7.237	5.596
			4.583	7.96
			3.088	0.965
			11.096	0.917
			0.82	0.868
			3.281	0.482
			15.149	1.206
			1.013	2.316
			1.592	3.908
			3.618	7.188
			11.145	3.039
			5.403	3.956
			1.158	2.605
			4.921	2.171
			2.075	3.329
			4.294	1.496
			15.197	18.864
			10.662	1.496
			4.149	1.689
			0.917	2.412
			7.43	10.855
			2.268	4.632
			2.991	2.895
			1.93	0.048
			1.303	2.46
			8.25	5.645
			27.065	9.408
			4.342	2.75
			4.342	3.329
			5.838	2.557
			24.798	2.123
			6.851	1.447
			5.596	1.496
			4.294	3.184
			2.895	1.882
			12.158	3.329
			2.026	2.075
			5.741	4.101
			6.803	7.333
			8.877	1.061
			14.715	6.368
			4.921	2.026
			1.882	1.882
			6.031	0.724
			5.982	1.11
			12.061	8.153
			11.338	3.281
			2.268	3.136
			4.053	3.136
			8.25	2.75
			1.399	0.724
			4.294	1.158
			5.162	4.149
			4.101	2.026
			1.833	1.978
			10.469	1.496
			7.526	6.224
			16.307	4.583
			1.544	1.013
			0.917	2.943
			4.101	5.596
			3.039	2.364
			1.592	1.303
			8.781	3.329
			1.158	1.93
			7.623	5.452
			1.978	4.101
			12.978	2.026
			8.636	1.447
			3.136	1.11
			3.088	1.254
			10.614	5.548
			4.053	1.399
			2.268	2.171
			0.627	2.123
			7.478	2.412
			17.32	22.965
			14.087	5.789
			6.175	18.864
			0.917	1.544
			8.105	7.188
			2.316	3.039
			2.653	1.544
			4.535	6.899
			0.82	4.246
			2.991	3.618
			3.908	0.965
			1.496	0.965
			4.101	0.724
			0.531	1.351
			4.39	2.895
			1.254	7.333
			1.64	1.64
			1.254	5.838
			11.965	5.403
			2.509	8.974
			1.689	8.25
			3.667	6.368
			1.592	2.509
			2.557	9.022
			1.206	1.785
			4.39	3.377
			17.754	3.281
			1.737	5.114
			32.903	6.803
			5.066	2.364
			2.846	3.715
			5.066	6.899
			8.925	1.833
			10.469	20.697
			10.71	1.158
			1.061	12.785
			0.965	1.254
			14.859	2.798
			3.667	4.004
			6.899	4.728
			7.381	15.39
			16.403	8.588
			7.237	2.653
			3.715	1.544
			1.689	7.623
			1.303	18.478
			9.504	2.943
			1.785	10.807
			2.605	2.702
			3.377	0.965
			8.732	9.118
			8.153	13.653
			2.268	4.294
			2.46	6.947
			10.373	0.675
			2.123	0.531
			11.531	1.93
			5.693	3.425
			4.197	1.013
			1.689	5.017
			2.702	8.105
			2.943	5.066
			1.158	4.004
			7.526	3.86
			2.846	3.281
			4.246	5.355
			17.706	1.833
			5.307	7.188
			1.013	7.044
			8.732	18.719
			3.232	1.496
			5.355	6.224
			4.583	9.359
			6.368	1.206
			10.324	3.618
			5.693	10.083
			15.824	9.697
			5.114	2.316
			13.026	5.017
			0.868	1.496
			12.881	3.088
			3.039	0.579
			8.974	0.675
			1.158	1.689
			9.359	2.364
			15.921	7.14
			11.868	2.46
			9.601	2.895
			9.842	2.991
			12.351	2.846
			10.662	0.579
			1.64	4.294
			6.61	2.75
			6.079	3.088
				9.601
				2.171
				2.75
				1.399
				2.798
				6.031
				4.39
				1.592
				1.399
				2.316
				2.702
				2.268
				1.689
				1.399
				9.215
				4.776
				4.246
				1.689
				1.882
				3.715
				3.763
				7.526
				7.285
				1.93
				3.136
				2.026
				4.101
				7.381
				2.702
				2.412
				7.285
				1.399
				2.605
				1.158
				1.351
				7.719
				7.478
				12.351
				3.232
				1.785
				17.32
				6.224
				5.21
				1.882
				9.215
				3.088
				10.566
				10.903
				2.075
				8.443
				2.268
				4.342
				9.215
				8.974
				1.158
				1.013
				9.311
				3.522
				7.574
				3.281
				12.592
				1.592
				2.412
				10.035
				6.224
				1.785
				2.026
				7.864
				6.899
				3.232
				3.57
				3.667
				4.487
				4.246
				8.395
				2.991
				2.605
				4.487
				0.965
				0.675
				1.496
				1.544
				1.689
				0.917
				3.474
				1.93
				4.342
				7.478
				2.846
				1.158
				1.882
				1.544
				8.974
				1.496
				3.232
				3.715
				3.281
				1.303
				7.14
				3.86
				3.377
				5.741
				4.101
				5.452
				9.215
				1.544
				4.101
				1.013
				1.592
				2.75
				1.061
				0.675
				0.675
				1.544
				4.004
				2.316
				7.671
				1.013
				1.978
				0.965
				1.206
				1.882
				1.496
				1.93
				2.026
				3.57
				1.399
				1.978
				5.548
				0.724
				3.956
				3.136
				2.798
				1.785
				3.184
				5.307
				7.285
				2.557
				7.623
				20.215
				2.268
				0.917
				2.557
				0
				1.254
				16.837
				4.873
				2.991
				1.93
				5.452
				1.882
				6.32
				6.417
				1.737
				8.009
				1.013
				4.149
				4.149
				9.745
				11.096
				5.982
				3.715
				3.57
				5.307
				4.246
				5.017
				10.566
				2.316
				5.162
				2.268
				3.667
				2.605
				1.833
				4.873
				2.123
				8.974
				13.316
				1.206
				9.794
				9.745
				6.465
				0.531
				1.303
				0.965
				0.868
				11.868
				4.583
				1.254
				2.171
				2.846
				1.061
				1.303
				1.11
				2.316
				3.232
				7.767
				0.338
				2.316
				4.342
				7.092
				3.039
				3.088
				1.061
				3.088
				1.206
				2.557
				2.026
				1.592
				4.342
				0.965
				0.772
				1.882
				7.14
				2.46
				1.11
				1.544
				0.772
				1.64
				2.605
				1.978
				2.46
				2.702
				10.373
				2.412
				2.316
				1.061
				2.605
				3.715
				4.632
				0.675
				0.772
				0.82
				2.943
				1.013
				6.272
				2.509
				1.399
				13.798
				2.075
				5.017
				3.667
				2.123
				9.601
				1.447
				1.254
				1.978
				2.219
				3.281
				1.158
				1.206
				2.509
				2.268
				2.991
				0.965
				4.632
				0.193
				5.162
				1.254
				0.675
				1.061
				0.627
				0.868
				2.46
				2.895
				3.329
				2.605
				4.969
				5.355
				4.68
				2.316
				10.421
				1.544
				1.351
				3.184
				18.14
				3.908
				2.605
				5.5
				6.658
				8.684
				0.965
				1.737
				0.772
				0.965
				0.82
				2.846
				11.338
				5.21
				10.083
				2.702
				2.364
				1.061
				2.846
				0.627
				4.053
				16.789
				18.671
				1.64
				2.46
				2.798
				3.522
				1.882
				3.232
				0.724
				1.544
				4.149
				3.57
				2.895
				1.544
				1.399
				1.351
				5.21
				10.566
				5.114
				11.241
				6.031
				1.689
				2.846
				7.092
				1.254
				5.838
				4.439
				2.702
				4.728
				0.724
				12.302
				1.254
				0.386
				11.096
				19.153
				3.232
				2.075
				3.184
				1.544
				3.667
				1.544
				2.702
				1.206
				2.943
				3.811
				3.908
				1.93
				1.592
				1.303
				1.64
				2.846
				0.82
				0.868
				4.776
				1.882
				1.206
				1.496
				5.21
				1.254
				0.82
				0.724
				1.447
				1.592
				1.689
				2.412
				4.921
				4.39
				1.399
				1.351
				0.772
				1.254
				3.232
				1.447
				7.767
				0.772
				1.785
				3.86
				8.491
				11.338
				1.158
				2.943
				17.513
				8.636
				12.544
				11.338
				1.93
				0.531
				3.377
				4.439
				19.877
				2.798
				3.956
				2.846
				7.816
				1.785
				12.399
				1.833
				3.136
				2.846
				3.136
				4.728
				2.075
				0.579
				10.566
				3.474
				3.136
				0.772
				2.798
				0.724
				3.232
				5.307
				2.605
				1.882
				1.496
				3.763
				0.965
				9.745
				1.351
				4.487
				1.544
				2.46
				5.982
				1.399
				3.715
				2.509
				3.039
				6.513
				3.136
				2.895
				2.316
				2.943
				3.763
				1.689
				1.061
				5.982
				1.303
				11.289
				3.329
				2.364
				20.697
				4.632
				4.439
				2.364
				3.86
				1.013
				3.088
				1.447
				2.412
				1.254
				3.57
				13.364
				0.917
				5.645
				1.592
				21.035
				18.574
				0.675
				0.579
				2.46
				2.991
				6.465
				1.11
				2.412
				1.785
				0.724
				1.303
				5.017
				12.158
				8.925
				2.46
				2.268
				1.11
				3.232
				7.381
				8.25
				2.557
				1.544
				4.004
				6.031
				3.57
				1.882
				1.689
				0.627
				2.895
				0.724
				0.579
				3.618
				1.11
				3.039
				2.268
				1.206
