# Supplementary material for: A circuit-dependent ROS feedback loop mediates glutamate excitotoxicity to sculpt the Drosophila motor system
Source: eLife. 2019 Jul 18;8:e47372. doi: 10.7554/eLife.47372 (PMC6682402; doi:10.7554/eLife.47372)
Supplement: Figure 2—figure supplement 3—source data 1. [file elife-47372-fig2-figsupp3-data1.xlsx]

## Sheet: 工作表1
Figure 2-figure supplement 3 Panel B (Burst duration (s))			Figure 2-figure supplement 3 Panel C (> 15 s bursts (s/min))			Figure 2-figure supplement 3 Panel D (Burst frequency (/min))			Figure 2-figure supplement 3 Panel E (Intra-burst spike density (/s))			Figure 2-figure supplement 3 Panel F (Locomotion (mm/min))			Figure 2-figure supplement 3 Panel J (Normalized Bouton Number)				Figure 2-figure supplement 3 Panel K (Surface area of muscle6/7 (mm2))
control (w1118)	eaat1hypo/SM2		control (w1118)	eaat1hypo/SM2		control (w1118)	eaat1hypo/SM2		control (w1118)	eaat1hypo/SM2		control (w1118)	eaat1hypo/SM2		control (w1118)	eaat1hypo/SM2	repo>eaat1-venus in eaat1hypo/SM2		control (w1118)	eaat1hypo/SM2	repo>eaat1-venus in eaat1hypo/SM2
2.09575	6.80761		0	3.11116		7.1	2.5		18.73	16.1114		84.8358	1.2024		1.04797	3.2223	0.588912		56983.7	30140.8	79116.4
3.84006	6.88018		0	1.81619		3.9	1.6		16.8534	13.7169		71.8806	0.433445		1.32454	3.33447	0.736574		47562.5	34243.7	80183.5
3.69842	38.4863		0	48.8543		4.7	1.4		17.7477	10.0462		93.9104	1.73378		0.655267	3.28875	1.11964		65095.9	30130.4	46889
7.13086	36.5742		0	31.893		4.5	1		21.0291	10.439		99.4019	2.15759		1.06183	3.28902	1.04374		57475.9	28132.7	49041.1
5.08684	12.3237		1.69484	6.15451		4.4	1.9		14.4088	10.9887		92.5515	1.37258		1.08127	2.82431	1.60081		38842.3	32529.3	45093.3
3.40004	31.3642		0	40.2225		2.7	1.33333		22.211	15.2682		76.8734	0.433445		0.892673	2.60752	1.36755		46313.4	34478.8	50385.3
	23.3969			33.0708		5.6	1.8		28.6995	4.64686		69.5712	3.82876		1.38996	3.90769	0.963722		39658.5	32747.2	47587.3
	10.3394			2.42687		3.6	1.3		22.928	3.06521		90.4009	0.953579		1.35725	3.58891	0.853944		48350.4	35290.1	67412.8
	11.5193			16.4695		6.97681	2.6		25.6478	10.2036		80.7861	1.27583		0.86542	2.62251	0.719543		64454.1	31028.6	63783.4
	20.5322			34.8309		4.4	2.1		20.6099	9.75937		113.42	2.47944		0.925258	3.70124	1.07788		60995	28722.8	74785.3
	12.6121			21.3564		1.7	3		29.8305	9.30321		60.019	2.14243		1.00146	2.9997	1.34594		66838.5	25814.5	69405.6
	6.23429			6.82691		3.2	2.9		27.3441	10.9406		86.6433	0.385155		0.995938	2.92235	1.331		59302	29417	41930.6
	44.6319			41.6116		5.6	1		23.6841	9.1549		74.6667	2.14243		0.981865		1.1838		66167.1		48810.9
	14.6733			12.4889		4.9	1.5		23.6511	9.66379		86.9708			1.00525		2.03529		63322.2		46565
												62.5289			1.23081				44786.5		30308.3
												85.1416			0.661903				71383.4		38579.7
												38.5071			1.08755				58530.6		34966.8
												85.7909			0.882115				65466.1
												76.7119			0.984944				67292.8
												58.4389			0.800377				64772.6
												78.0071			0.76636				55659.5
												96.9871
												72.7442
												75.1932
												90.8665
												31.6398
