# Supplementary material for: A circuit-dependent ROS feedback loop mediates glutamate excitotoxicity to sculpt the Drosophila motor system
Source: eLife. 2019 Jul 18;8:e47372. doi: 10.7554/eLife.47372 (PMC6682402; doi:10.7554/eLife.47372)
Supplement: Figure 2—source data 1. [file elife-47372-fig2-data1.xlsx]

## Sheet: 工作表1
Figure 2 Panel C (Normalized iGluSnFR fluorescence)					Figure 2 Panel F (Burst duration (s))							Figure 2 Panel G (> 15 s bursts (s/min))							Figure 2 Panel H (Normalized bouton number)							Figure 2 Panel I (Locomotion (mm/min)
OK371>UAS-iGluSnFR+UAS-RFP	OK371>UAS-iGluSnFR++UAS-vglut-RNAi	OK371>UAS-iGluSnFR+UAS-RFP in eaat1hypo	OK371>UAS-iGluSnFR++UAS-vglut-RNAi in eaat1hypo		eaat1hypo	repo>eaat1-venus in eaat1hypo	alrm>eaat1-venus in eaat1hypo	nSyb>eaat1-venus in eaat1hypo	repo >hEAAT2-egfp in eaat1hypo	control (w1118)		eaat1hypo	repo>eaat1-venus in eaat1hypo	alrm>eaat1-venus in eaat1hypo	nSyb>eaat1-venus in eaat1hypo	repo >hEAAT2-egfp in eaat1hypo	control (w1118)		eaat1hypo	repo>eaat1-venus in eaat1hypo	alrm>eaat1-venus in eaat1hypo	nSyb>eaat1-venus in eaat1hypo	repo >hEAAT2-egfp in eaat1hypo	control (w1118)		eaat1hypo	repo>eaat1-venus in eaat1hypo	alrm>eaat1-venus in eaat1hypo	nSyb>eaat1-venus in eaat1hypo	repo >hEAAT2-egfp in eaat1hypo	control (w1118)
0.876686	0.665703	1.36253	1.0597		9.56771	3.30419	1.9042	5.14787	14.117	2.09575		14.2062	0	1.86328	2.75188	22.0009	0		1.10831	0.657996	0.756449	0.850612	0.777526	0.779468			56.5062	51.5704	20.2274	64.7135	64.3601
0.896262	0.682081	1.46251	1.40445		21.6707	7.1679	6.65859	2.90844	5.9872	3.84006		20.9281	0.1	0	0	3.67382	0		1.21355	0.728857	0.871207	1.2565	0.816458	0.854037		0.663637	47.0683	42.732	25.5973	81.0518	52.769
0.919266	0.775599	1.51983	1.45926		34.8591	9.40596	6.32578	3.49172	4.4507	3.69842		49.7972	0.1	2.35677	1.53444	0	0		1.377	0.780683	0.919112	0.501442	0.824255	0.856935		2.58037	52.6141	43.1051	2.7238	84.4096	64.1144
0.920261	0.83815	1.53594	1.61115		10.491	3.69966	7.49535	5.08437	10.5028	7.13086		10.2597	0	0	0	10.8969	0		1.4732	0.788937	0.920788	1.33915	0.925084	0.87865		4.42692	50.7337	49.3222	9.54536	76.984	58.5384
0.941176	0.844894	1.61911	1.62442		32.7887	8.05641	4.93227	4.30755	13.5053	5.08684		33.4674	0	5.5217	0	17.6213	1.69484		1.49441	0.804174	1.01791	1.04669	0.987009	0.90786		13.9584	53.4146	38.1582	8.87044	71.3287	56.4704
0.976879	0.854031	1.70405	1.74989		14.4317	3.28366	4.114	2.33886	3.52062	3.40004		21.022	0	0	0	0	0		1.51295	0.965972	1.21911	1.07611	0.994105	0.934998		2.66858	45.6601	36.1896	8.41245	48.7518	61.1444
0.985621	0.874759	1.78475	1.78468		6.91867	6.15778	2.32147	3.05969	9.97373			1.51713	0	0	0	0			1.51611	0.977154	1.25033	1.18906	1.00287	0.938014		1.52175	67.9667	29.9773	4.48343	28.9475	55.1429
1.00305	0.935076	1.81907	1.83145		29.7847	3.15128		3.27651	10.0022			40.1896	0		0	3.348			1.52112	1.05527	1.28555	1.13903	1.01141	0.971203		1.76435	44.3249	45.9392	7.96258	53.6612	52.6317
1.01305	0.958606	2.03132	1.908		12.3177	1.71806		2.46005				6.76939	0		0				1.5609	1.08374	1.31952	1.27355	1.16405	0.987481		9.68389	83.8354	39.7606	20.8567	93.1906	61.3617
1.01638		2.09688	1.95797																1.57464			1.17953	1.17256	1.02656		2.99719	47.8209	41.6425	20.3755	84.7576	44.0487
1.06928		2.16605																	1.5844			0.881875	1.28413	1.05716		1.48555	45.2142	57.0757	8.64771		36.4933
1.08061		2.17952																	1.66271			1.21342		1.06907		2.00549	58.1632	52.5806	13.7785		32.3012
1.13006		2.26675																	1.71424			1.38987		1.07144		4.2057	59.6253	28.0369	6.74473		57.9325
1.17142		2.39239																	1.84772			1.14684		1.07486		6.0898	50.4834	46.3834	19.9826		40.2267
		2.44813																	1.98839			1.17106		1.09715		11.9376	45.0863	57.8439	30.01		81.368
		2.62508																						1.1017		2.13593	54.1752	54.7078	25.9605		64.4982
		3.1117																						1.39342		7.55775	55.8458	85.713	17.8614		55.8434
																											72.1268	70.1176	12.7513		29.9136
																											72.8656	63.5065	6.99029		25.0012
																											65.365	86.4186			57.4514
																											83.6235	58.4006
																											68.1744	71.9065
																											75.6947	42.9063
																											68.5022	48.4305
																											24.8505
