# Supplementary material for: A circuit-dependent ROS feedback loop mediates glutamate excitotoxicity to sculpt the Drosophila motor system
Source: eLife. 2019 Jul 18;8:e47372. doi: 10.7554/eLife.47372 (PMC6682402; doi:10.7554/eLife.47372)
Supplement: Figure 3—figure supplement 1—source data 1. [file elife-47372-fig3-figsupp1-data1.xlsx]

## Sheet: 工作表1
Figure 3-figure supplement 1 Panel B (Burst duration (s))				Figure 3-figure supplement 1 Panel C (> 15 s bursts (s/min))				Figure 3-figure supplement 1 Panel D (Locomotion (mm/min))
eaat1hypo	gluClαglc1/+ in eaat1hypo	control (w1118)		eaat1hypo	gluClαglc1/+ in eaat1hypo	control (w1118)		eaat1hypo	gluClαglc1/+ in eaat1hypo	control (w1118)
18.0388	10.4157	3.67393		34.4888	16.188	0		0.663637	20.8159	64.3601
11.6043	7.63882	5.51416		12.6723	5.23679	0		2.58037	1.35645	52.769
24.8282	33.5981	3.0275		13.4981	43.267	0		4.42692	8.49283	64.1144
49.734	6.75506	4.52914		19.0245	0	0		13.9584	8.995	58.5384
33.2569	9.11206	3.67825		47.8416	20.5764	0		2.66858	9.22107	56.4704
7.54453	6.34603	3.98972		3.19297	0	0		1.52175	15.7453	61.1444
10.2244	40.4053	4.86633		1.52196	43.8075	0.4		1.76435	10.3795	55.1429
20.0706	11.8312	2.97746		25.0268	20.7001	0		9.68389	13.5865	52.6317
	9.98095				12.025			2.99719	2.81338	61.3617
	16.0685				29.8172			1.48555	16.3279	44.0487
	6.99683				6.36675			2.00549	7.13416	36.4933
								4.2057	14.736	32.3012
								6.0898	20.3968	57.9325
								11.9376	13.094	40.2267
								2.13593	7.10405	81.368
								7.55775	17.8836	64.4982
									15.6514	55.8434
									21.8717	29.9136
									3.12224	25.0012
									5.40281	57.4514
									3.91583
									10.8036
									12.5711
									14.4148
									4.60721
