# Supplementary material for: A circuit-dependent ROS feedback loop mediates glutamate excitotoxicity to sculpt the Drosophila motor system
Source: eLife. 2019 Jul 18;8:e47372. doi: 10.7554/eLife.47372 (PMC6682402; doi:10.7554/eLife.47372)
Supplement: Figure 3—source data 1. [file elife-47372-fig3-data1.xlsx]

## Sheet: 工作表1
Figure 3 Panel B (Burst duration (s))						Figure 3 Panel C (> 15 s bursts (s/min))						Figure 3 Panel D (Locomotion (mm/min)
eaat1hypo	OK371>vglut-RNAi in eaat1hypo	tsh>eaat1-venus in eaat1hypo	gluRIIDe01443/+ in eaat1hypo	control (w1118)		eaat1hypo	OK371>vglut-RNAi in eaat1hypo	tsh>eaat1-venus in eaat1hypo	gluRIIDe01443/+ in eaat1hypo	control (w1118)		eaat1hypo	OK371>vglut-RNAi in eaat1hypo	tsh>eaat1-venus in eaat1hypo	gluRIIDe01443/+ in eaat1hypo	control (w1118)
18.0388	7.12154	10.0523	20.6161	3.67393		34.4888	4.12159	9.2995	18.0297	0		0.663637	21.1463	27.0754	12.7971	64.3601
11.6043	7.88603	13.6186	8.05973	5.51416		12.6723	5.45153	5.26143	6.38517	0		2.58037	12.6356	26.6272	12.5367	52.769
24.8282	10.0639	7.49853	7.31299	3.0275		13.4981	11.3269	1.53946	0	0		4.42692	21.1127	17.6035	13.2887	64.1144
49.734	12.3225	5.96638	7.90848	4.52914		19.0245	15.3916	0	1.80205	0		13.9584	16.2608	21.1777	2.92977	58.5384
33.2569	10.3818	11.8894	6.63927	3.67825		47.8416	10.6717	18.9053	0	0		2.66858	23.1728	25.2313	12.1082	56.4704
7.54453	7.88434	5.39973	9.51361	3.98972		3.19297	1.55534	0	9.00514	0		1.52175	4.73295	25.5097	21.68	61.1444
20.0706		17.0288	5.46797	4.86633		25.0268		23.8044	0	0.4		1.76435	20.3853	0.921459	12.34	55.1429
				2.97746						0		9.68389	34.1938	33.3217	24.16	52.6317
												2.99719	27.9707	57.4811	24.3894	61.3617
												1.48555	9.07647	12.0611	32.0977	44.0487
												2.00549	28.6967	25.009	10.4217	36.4933
												4.2057	15.0531		15.3815	32.3012
												6.0898	16.2328		5.86195	57.9325
												11.9376	29.6438		1.40327	40.2267
												2.13593	1.87525		0	81.368
												7.55775	21.4463		2.40561	64.4982
													6.87262		1.66611	55.8434
													7.52257		0	29.9136
													25.813			25.0012
													32.9567			57.4514
													10.6348
