# Supplementary material for: A circuit-dependent ROS feedback loop mediates glutamate excitotoxicity to sculpt the Drosophila motor system
Source: eLife. 2019 Jul 18;8:e47372. doi: 10.7554/eLife.47372 (PMC6682402; doi:10.7554/eLife.47372)
Supplement: Figure 4—source data 1. [file elife-47372-fig4-data1.xlsx]

## Sheet: 工作表1
Figure 4 Panel B (Normalized H2DCFDA fluorescence)					Figure 4 Panel C (Normalized H2DCFDA fluorescence)						Figure 4 Panel E (Burst duration (s))								Figure 4 Panel F (> 15 s bursts (s/min))								Figure 4 Panel G (Locomotion (mm/min)
control (w1118)	eaat1hypo	gluRIIDe01443/+ in eaat1hypo	2 mM AP in eaat1hypo		control (w1118)	UAS-hSOD1/+ in eaat1hypo	nSyb>hSOD1 in eaat1hypo	OK371>hSOD1 in eaat1hypo	cha>hSOD1 in eaat1hypo		UAS-hSOD1/+ in eaat1hypo	nSyb>hSOD1 in eaat1hypo	OK371>hSOD1 in eaat1hypo	gad1>hSOD1 in eaat1hypo	cha>hSOD1 in eaat1hypo	NP2225>hSOD1 in eaat1hypo	control (w1118)		UAS-hSOD1/+ in eaat1hypo	nSyb>hSOD1 in eaat1hypo	OK371>hSOD1 in eaat1hypo	gad1>hSOD1 in eaat1hypo	cha>hSOD1 in eaat1hypo	NP2225>hSOD1 in eaat1hypo	control (w1118)		UAS-hSOD1/+ in eaat1hypo	nSyb>hSOD1 in eaat1hypo	OK371>hSOD1 in eaat1hypo	gad1>hSOD1 in eaat1hypo	cha>hSOD1 in eaat1hypo	NP2225>hSOD1 in eaat1hypo	control (w1118)
0.251502	4.51769	0.392166	1.72446		0.251502	1.87492	0.451814	6.48651	0.322724		8.72411	4.98252	4.79514	7.67122	8.38879	7.81013	3.67393		6.31958	0	9.88973	8.7869	0	5.70111	0		11.8658	13.4079	3.13181	11.804	8.86013	24.651	64.3601
0.819497	0.935678	0.758513	0.45582		0.819497	2.06009	0.640997	3.65435	0.501669		14.5033	6.07815	26.0702	6.35327	5.73342	7.32642	5.51416		18.5181	0	32.3488	0	1.85561	0	0		0.971295	3.05638	1.47656	1.672	12.8751	0.8175	52.769
0.978411	2.66281	2.09481	1.53528		0.978411	5.33007	0.922324	4.98449	0.541286		10.5049	6.46256	2.21531	3.66821	8.24733	52.6968	3.0275		10.7355	0	0	0	1.71726	34.484	0		12.1923	34.842	4.08771	13.67	8.30802	1.5	64.1144
1.01936	7.65902	2.11752	0.534164		1.01936	1.08702	0.393946	1.14659	0.296461		6.00557	3.99184	4.10179	22.1769	6.817	15.5368	4.52914		2.09253	0	0	39.9858	1.81141	18.2265	0		0.566756	14.7961	17.4556	2.536	17.0756	0.704	58.5384
0.974405	4.42778	2.36323	1.05052		0.974405	1.02871	0.220343	2.26535	2.73537		8.12802	2.93426	5.19265	18.0032	4.46932	12.1729	3.67825		7.31556	0	0	26.9843	9.15933	25.0901	0		2.00868	25.937	0	8.042	12.3367	9.222	56.4704
0.817716	3.25529	4.37837	0.455375		0.817716	2.41665	1.90697	2.50945			12.5356	5.20415	10.4008	13.0272	5.02742	14.0997	3.98972		14.6768	1.55319	16.6653	6.57178	0	26.393	0		1.6482	13.8755	3.40168	13.536	14.0294	21.954	61.1444
1.88961	2.4714	0.540841			1.88961	2.44202					8.79706	3.14094	12.0048	2.69668		3.73724	4.86633		12.0481	10.5896	14.3092	0	0	0	0.4		3.3004	14.6156	1.28617	14.416	13.2188	15.678	55.1429
1.2495	6.98153				1.2495	2.76608					13.2401		13.0188			13.9541	2.97746		3.16549	0	16.0246				0		5.61348	13.9737	1.75484	1.998	10.2834	5.224	52.6317
											19.8697								17.7845								0.761269	53.7413	5.17768	1.916	22.4857	13.828	61.3617
											12.4855								11.0851								1.52254	15.532	6.14764	0.886	34.8879	4.654	44.0487
																											12.6371	16.842		2.176	11.6379	1.33	36.4933
																											8.5202	1.31445		5.458	43.1608	1.76	32.3012
																											0.446745	5.62312		4.95	24.3885	3.936	57.9325
																											3.39165	40.3453		16.98	30.471	0.614	40.2267
																											6.66911	49.3273		0.55	31.7325		81.368
																											3.09716	38.3459		1.352	17.0547		64.4982
																											0.803339	47.5451		2.522	0.818155		55.8434
																											3.75225	19.2458			4.47034		29.9136
																											8.4601	11.4121			9.79343		25.0012
																											2.61235	9.9604			5.34923		57.4514
																											0.737229
																											4.31319
																											0.971619
																											2.03139
																											0.943573
																											1.35025
																											14.6644
