# Supplementary material for: A circuit-dependent ROS feedback loop mediates glutamate excitotoxicity to sculpt the Drosophila motor system
Source: eLife. 2019 Jul 18;8:e47372. doi: 10.7554/eLife.47372 (PMC6682402; doi:10.7554/eLife.47372)
Supplement: Figure 5—figure supplement 1—source data 1. [file elife-47372-fig5-figsupp1-data1.xlsx]

## Sheet: 工作表1
Figure 5-figure supplement 1 Panel B (Elav+ neurons/100xmm2)			Figure 5-figure supplement 1 Panel D (Astrocytes/100xmm2)			Figure 5-figure supplement 1 Panel E (Normalized GFP intensity)			Figure 5-figure supplement 1 Panel G (Normalized GFP intensity in dendritic field )
control (w1118)	eaat1hypo		control (w1118)	eaat1hypo		control (w1118)	eaat1hypo		control (w1118)	eaat1hypo
3.69432	2.93396		0.323219	0.329334		0.875838	1.05916		0.821646	0.977989
3.20099	3.28258		0.363118	0.184491		0.954748	0.932374		0.954572	1.54872
3.31097	3.57939		0.327274	0.336137		0.870718	1.02937		0.890852	0.99279
3.89614	3.29532		0.561348	0.463163		1.15573	1.13318		1.06425	1.07491
3.56706	2.71543		0.306837	0.409971		0.916145	1.09495		0.965373	0.774876
3.45826	3.20557		0.46811	0.384273		1.22682			1.10071	0.854959
3.51846	2.88856		0.333354	0.497176					1.08639	0.988172
2.86744	3.47945		0.463917	0.293786					1.11621	1.19195
			0.305972	0.492747
