# Supplementary material for: A circuit-dependent ROS feedback loop mediates glutamate excitotoxicity to sculpt the Drosophila motor system
Source: eLife. 2019 Jul 18;8:e47372. doi: 10.7554/eLife.47372 (PMC6682402; doi:10.7554/eLife.47372)
Supplement: Figure 5—source data 1. [file elife-47372-fig5-data1.xlsx]

## Sheet: 工作表1
Figure 5 Panel B (Locomotion (mm/min)								Figure 5 Panel E (Locomotion (mm/min)							Figure 5 Panel F (Burst duration (s))											Figure 5 Panel G (> 15 s bursts (s/min))
No Rescue	Full Rescue	Embryonic Rescue	L1-L3 Rescue	L2-L3 Rescue	L3 rescue	mL3 Rescue		eaat1hypo	2 mM 4-AP (fed) eaat1hypo	15 mg/ml AD4 (fed) eaat1hypo	w1118	2 mM 4-AP (fed) w1118	15 mg/ml AD4 (fed) w1118		Wild type (w1118)	0.003% H2O2 Wild type (w1118)	0.006% H2O2 Wild type (w1118)	0.006% H2O2 cha>hSOD1	0.2 mM 4-AP Wild type (w1118)	0.2 mM 4-AP 0.006% H2O2 Wild type (w1118)	eaat1hypo	0.2 mM 4-AP (Acute) eaat1hypo	2 mM 4-AP (Fed) eaat1hypo	15 ug/ml AD4 eaat1hypo		Wild type (w1118)	0.003% H2O2 Wild type (w1118)	0.006% H2O2 Wild type (w1118)	0.006% H2O2 cha>hSOD1	0.2 mM 4-AP Wild type (w1118)	0.2 mM 4-AP 0.006% H2O2 Wild type (w1118)	eaat1hypo	0.2 mM 4-AP (Acute) eaat1hypo	2 mM 4-AP (Fed) eaat1hypo	15 ug/ml AD4 eaat1hypo
2.62439	45.2084	0	66.266	50.1194	63.4533	43.3733		0.44	12.62	27.09	60.558	57.8309	19.003		3.67393	15.8274	6.95043	5.69153	2.46523	6.23474	18.0388	4.4645	4.0554	5.48777		0	18.0403	5.11994	4.21475	0	3.67068	34.4888	1.74576	1.57122	2.3431
11.7757	58.3607	0	42.7762	35.9836	63.8578	46.2254		1.14	29.93	21.98	47.3817	19.5336	66.5946		5.51416	8.31152	8.73331	5.90377	4.51798	9.88314	11.6043	3.40003	2.4685	16.3494		0	7.54505	9.31088	0	0	21.8095	12.6723	3.71304	0	16.5184
3.29476	50.8827	0	35.275	61.2846	54.5298	41.1565		1.84	19.63	18.28	35.4821	15.1313	45.4294		3.0275	4.47978	15.3931	8.31478	16.4507	5.28272	24.8282	2.31918	3.0831	2.64854		0	0	23.7606	10.6369	24.4944	1.67336	13.4981	0	0	0
0.369978	49.9804	0	50.8261	52.0183	62.4522	46.1687		2.12	17.51	14	76.3012	65.8041	56.5592		4.52914	7.34172	4.64293	11.2025	3.85417	3.52796	49.734	6.76795	2.8575	3.77849		0	5.80638	3.50538	14.2438	6.49502	0	19.0245	2.35506	0	0
11.803	53.9594	0	58.425	45.3172	56.8291	47.7796		2.36	2	10.26	70.1182	68.346	51.8439		3.67825	4.16034	25.834	6.74475	7.27346	4.83706	33.2569	1.92262	16.6539	4.84825		0	0	27.9739	2.15131	14.074	0	47.8416	0	12.0764	0
15.465	53.7079	0	41.8139	42.3548	36.3781	62.6746		3.02	20.16	17.27	78.5862	40.0671	36.452		3.98972	10.4269	28.3634	6.71224	2.80124	4.12594	7.54453	9.44084	5.74	30.2054		0	31.8225	32.584	0	0	0	3.19297	10.6772	0	19.1213
1.96508	39.9449	1.24642	62.0776	58.6792	47.9943	45.9276		4.5	2.33	18.3	67.5556	41.8336	43.0878		4.86633	20.4852	10.2433	4.04192	1.60169	5.65014	10.2244	12.0585	2.9192	11.3417		0.4	30.4486	15.2317	2.85837	0	2.40014	1.52196	10.1233	0	4.67139
12.4169	43.571	0	49.3649	62.055	63.1773	43.9841		5.16	21.98	3	22.006	19.9906	63.36		2.97746	3.21756		2.30167	2.43925	3.92272	20.0706	6.66218	11.7074	5.43886		0	0		0	0	0	25.0268	6.35014	7.14292	0
0.419407	43.475	0	68.9957	37.0897	70.9922			5.2	23.13	22.21	21.5976	29.2041	74.2816			7.60029		10.6456	1.38307	5.0562		10.5832	3.44033	3.50787			11.2374		17.0211	0	0		6.73878	0	0
0.383214	35.9081	0	56.2456	54.1196	91.4026			5.44	9.12	5.06	52.89	47.1434	46.2822					6.4805	2.9984				3.98465	6.41267					11.9642	0				0	2.49967
6.31772	40.0715	0	59.604	55.8804	106.975			5.74	55.87	30.66	64.95	44.0454	53.2673						3.64811				2.60805							3.4974				0
0.413754	39.4269	0	34.4084	37.4065	39.4655			5.82	36.09	35.7	63.78	39.026	13.1398						4.71505				1.34353							0				0
	39.4168	0.927065	39.5576	46.9244	29.9477			6.94	25.76	1.41	40.4953	61.3546	27.3468
	53.2606	6.48323	57.6106	43.2841				7.16	8.98	4.62	49.0073	28.1753	42.5835
	59.4079	6.96854	72.8728	60.3578				7.22	20.1	8.4	48.9822	53.2908	49.9376
	61.4982	10.7017	52.3467	73.2377				13.12	20.31	20.59	23.4907	41.6134	53.1628
	42.898	1.33149	45.7133	44.3304				17.08	40.71	8.68	75.4854	42.8634	45.4605
	29.774			64.8698					32.25	20.27	23.8249	51.5179	53.9163
	47.2937								21.42	6.24	72.241	37.9947	57.4912
	53.4212								21.88	10.42	20.4337	22.3738	51.8949
	49.6766								0.89	3.43	56.0241	37.0574	33.0335
										9.49	81.2347	28.3906	74.3575
										1.6	66.6738	51.2428	11.9538
										39.69	65.2177		60.2126
										32.21	56.3876		44.9157
										15.16	68.9208
										30.73
										3.37
										37.24
										22.54
										17.43
										20.39
										27.88
										12.73
