# Supplementary material for: A circuit-dependent ROS feedback loop mediates glutamate excitotoxicity to sculpt the Drosophila motor system
Source: eLife. 2019 Jul 18;8:e47372. doi: 10.7554/eLife.47372 (PMC6682402; doi:10.7554/eLife.47372)
Supplement: Figure 6—figure supplement 1—source data 1. [file elife-47372-fig6-figsupp1-data1.xlsx]

## Sheet: 工作表1
Figure 6-figure supplement 1 Panel B (Normalized muscle contractility)			Figure 6-figure supplement 1 Panel C (EJP amplitude (mV))			Figure 6-figure supplement 1 Panel D (mEJP amplitude (mV))			Figure 6-figure supplement 1 Panel E (Quantal content)			Figure 6-figure supplement 1 Panel F (Burst duration (s))			Figure 6-figure supplement 1 Panel G (> 15 s bursts (s/min))			Figure 6-figure supplement 1 Panel H (Burst frequency (/min))			Figure 6-figure supplement 1 Panel I (Intra-burst spike density (/s))
C57-GAL4/+	C57>dsod1-RNAi		C57-GAL4/+	C57>dsod1-RNAi		C57-GAL4/+	C57>dsod1-RNAi		C57-GAL4/+	C57>dsod1-RNAi		C57-GAL4/+	C57>dsod1-RNAi		C57-GAL4/+	C57>dsod1-RNAi		C57-GAL4/+	C57>dsod1-RNAi		C57-GAL4/+	C57>dsod1-RNAi
0.900412	0.911939		18.4337	16.5764		0.477285	0.472687		38.622	35.0685		5.53281	4.22242		0	0		3.1	3.3		18.144	7.25565
0.586363	0.517122		16.1174	17.7141		0.750456	0.699772		21.4768	25.314		2.90979	3.89964		0	0		4.4	2.6		18.9486	19.4791
1.06112	0.705371		21.2234	19.8597		0.58299	0.763608		36.4044	26.0078		1.34257	2.79728		0	0		4.8	1.8		15.5486	20.1584
1.02052	0.586663		31.7112	13.9065		0.736451	0.887116		43.0595	15.6761		1.96741	2.29753		0	0		2.3	3.7		21.9004	16.9395
1.22776	0.74296		18.4886	16.7149		0.699005	0.577919		26.4498	28.9225		3.26253	3.79153		0	1.78376		5.4	2.7		22.381	17.798
1.10419	0.955362		17.0331	25.3911		0.466055	0.54521		36.5474	46.5712		1.97474	2.08113		0	0		7	6		17.0245	14.6021
1.0979	0.895895			26.766			1.04689			25.5671			8.06238			5.10281			2.4			16.5429
0.893372	0.870312			36.3472			0.698677			52.0229			8.3408			1.99861			2.4			13.8376
1.0019	0.797264			15.7109			0.893714			17.5794			2.16106			0			2.8			15.2538
1.10646	0.705916												4.76635			0			2.9			22.7095
