# Supplementary material for: A circuit-dependent ROS feedback loop mediates glutamate excitotoxicity to sculpt the Drosophila motor system
Source: eLife. 2019 Jul 18;8:e47372. doi: 10.7554/eLife.47372 (PMC6682402; doi:10.7554/eLife.47372)
Supplement: Figure 6—source data 1. [file elife-47372-fig6-data1.xlsx]

## Sheet: 工作表1
Figure 6 Panel B (Normalized RFP/GFP)			Figure 6 Panel D (Normalized H2DCFDA fluorescence)				Figure 6 Panel E (Normalized H2DCFDA fluorescence)							Figure 6 Panel F (Normalized H2DCFDA fluorescence)					Figure 6 Panel G (Locomotion (mm/min))				Figure 6 Panel H (Locomotion (mm/min))					Figure 6 Panel I (Normalized H2DCFDA fluorescence)				Figure 6 Panel K (Burst duration (s))					Figure 6 Panel L (> 15 s bursts (s/min))					Figure 6 Panel M (Normalized iGluSnFR fluorescence)
C57 > mitotimer	C57 > mitotimer in eaat1hypo		control (w1118)	eaat1hypo	gluRIIDe01443/+ in eaat1hypo		control (w1118)	UAS-hSOD1/+ in eaat1hypo	nSyb>hSOD1 in eaat1hypo	OK371>hSOD1 in eaat1hypo	cha>hSOD1 in eaat1hypo	C57>hSOD1 in eaat1hypo		C57-GAL4/+ (muscle)	C57>dsod1-RNAi (muscle)	C57-GAL4/+ (VNC)	C57>dsod1-RNAi (VNC)		C57-GAL4/+	C57>dsod1-RNAi	C57>dsod2-RNAi		eaat1hypo	C57-GAL4/+ in eaat1hypo	UAS-hSOD1/+ in eaat1hypo	C57>hSOD1 in eaat1hypo		control (w1118)	UAS-hSOD1/+ in eaat1hypo	C57>hSOD1 in eaat1hypo		C57-GAL4/+ in eaat1hypo	UAS-hSOD1/+ in eaat1hypo	C57>hSOD1 in eaat1hypo	control (w1118)		C57-GAL4/+ in eaat1hypo	UAS-hSOD1/+ in eaat1hypo	C57>hSOD1 in eaat1hypo	control (w1118)		OK371>iGluSnFR	OK371>iGluSnFR in eaat1hypo	OK371>iGluSnFR in eaat1hypo (fed with 2 mM 4-AP)	OK371>iGluSnFR	OK371>iGluSnFR in eaat1hypo	OK371>iGluSnFR in eaat1hypo (fed with 15 mg/ml AD4)
1.2225	2.74552		1.31583	3.25912	0.938688		1.31583	2.02169	0.736208	1.87175	1.37909	2.2632		1.01246	1.6699	1.00762	1.71396		134.548	65.409	71.9135		3.25742	3.74224	6.96811	7.94		0.251502	1.87492	0.592477		2.77594	8.72411	8.93532	3.67393		0	6.31958	7.23722	0		1.00907	1.37964	1.41421	1.23565	2.0112	1.87916
0.679903	2.32811		1.54244	3.19843	0.847375		1.54244	2.49106	0.711371	1.47925	1.34453	1.772		1.14187	1.82422	2.14642	1.03501		92.1561	21.2534	37.5225		5.54129	4.02271	9.60973	7.68		0.819497	2.06009	0.849321		19.8996	14.5033	5.32476	5.51416		27.476	18.5181	3.65465	0		1.42175	1.48722	1.66677	1.07154	1.99694	1.87468
0.766738	2.00494		1.32861	4.41387	0.873419		1.32861	1.68496	1.34879	0.771978	0.527459	0.628177		0.775087	1.68512	0.963653	1.73919		38.2415	37.212	17.2187		0.969677	4.97028	3.18162	8.78		0.978411	5.33007	0.560872		4.67744	10.5049	1.70871	3.0275		0	10.7355	2.27456	0		0.793359	1.53194	1.75503	1.00402	1.96567	1.87264
0.839986	1.48151		1.20514	4.50511	1.52153		1.20514	2.502	0.840704	1.12871	0.941983	0.786366		0.748097	1.83945	1.18276	1.29953		112.742	12.2644	37.5406		4.12065	5.29883	10.5454	17.62		1.01936	1.08702	0.304919		15.1369	6.00557	4.78837	4.52914		16.839	2.09253	0	0		0.79904	1.43933	1.48121	0.914409	1.89864	2.08248
1.2568	2.72962		1.15683	3.90112	2.6385		1.15683	2.50127	2.28475	2.37847	1.39453	0.313084		1.24844	1.80138	0.550659	0.791392		52.4688	68.8056	29.8017		9.54194	5.90184	5.43243	19.48		0.974405	1.02871	0.934342		7.51848	8.12802	10.512	3.67825		7.08862	7.31556	7.73167	0		0.976789	2.51836	1.81036	0.924203	1.88633
1.38536	2.25213		1.58448	4.14621	2.46544		1.58448	2.8864	1.75102	1.54436	0.975342	0.331571		1.23322	3.00554	0.394254	0.349567		108.042	45.9346	62.9059		7.76323	5.96795	8.08703	43.6		0.817716	2.41665	1.16893		11.6675	12.5356	4.65751	3.98972		9.01652	14.6768	0	0			2.59513	1.73546	0.937104	1.89815
0.738087	5.24709		1.07435	2.51697	0.866586		1.07435	1.16036	0.934026	0.99391	0.461547	2.38361		1.4	0.700346	0.754633	0.335873		84.0972	27.7883	25.3138		5.26258	6.53289	8.74054	32.32		1.88961	2.44202			15.3047	8.79706	5.42683	4.86633		28.8097	12.0481	1.68875	0.4					0.937214	1.87288
1.11063	3.13607		0.749674	2.35653	1.19261		0.749674	1.54268	0.672386	1.25346	0.586298	1.77553		1.13356	0.767474				105.264	41.5012	20.0487		6.16065	7.70484	1.57161	35.4		1.2495	2.76608				13.2401	2.00304	2.97746			3.16549	0	0					0.975854
			1.62997	1.34606	2.9007		1.62997	2.1274	1.38729	2.45081	0.984183	0.895041		0.668512	1.76332				88.6604	56.0294	43.1395		4.49419	8.05743	2.05935	1.2							19.8697					17.7845
			0.631025	2.8237	3.62863		0.631025	1.26093	0.915619	1.70496	0.948494	0.828968		0.691349	1.84429				84.7089	7.86311	48.1162		1.79613	8.1015	0.849677	22.46							12.4855					11.0851
			0.273471	0.95605	0.822698		0.273471	0.86133	1.26592	3.0847	1.3082	0.827843		0.858131	1.02284				46.5444	49.2821	26.7366		5.02258	8.72254	1.15161	1.6
			0.713742	0.77246	0.497477		0.713742	1.43456	0.879608	2.09352	1.5778	0.593372		0.745329	0.841522				35.8754	18.8955	12.1402		4.76323	9.10918	2.89355	63.12
			0.667601	1.20202	0.732109		0.667601	1.39461			1.47145			1.03253	1.12664				74.8703	49.7275	20.0815		1.25	10.0427	10.9452	13.62
			0.381268		0.579627		0.381268	2.12619			1.72634			1.31142	0.841522				84.2675	22.0989	23.6735		0.708	11.1426	4.96645	5.86
			0.745575		0.98354		0.745575	1.50232			1.71404								26.2343	62.8544	9.35159		4.334	13.6828	7.50387	8.28
					0.402226			1.28022			1.52884								103.889	63.217	39.7563		4.96	13.809	3.39188	33
																			30.4603	43.6208	46.3352		4.374	14.6865	0.871875	21.5
																			21.7885	54.2901	22.2932		8.73	14.6885	9.33	4.42
																			177.838	45.7427	48.5629		6.912	15.4718	3.83438	33.24
																			61.1163	60	45.0491		0.76	16.0047	5.70937	17.34
																			50.6039	31.8278	24.7292		4.994	16.1649	6.17063	8.14
																				60.2637	22.6125		1.18	17.7295	3.4425	38.14
																				40.576	73.2536		6.52	18.0701	2.2275	37.04
																				31.5806	40.7094		1.238		4.0425	0
																				76.2115	35.055		8.99		0.725625
																				66.8515	25.9813		6.304		18.424
																				40.221	66.7849		8.028		6.52
																				44.0134	25.6107		7.058		15.968
																				38.0835	29.0564		0.53		0.45
																				62.1756	33.4277		8.522		13.238
																				33.6801			0.728		8.464
																				18.4467			7.286		9.152
																							5.588		3.006
																							22.312		20.314
																							9.976		16.872
																							2.458		10.92
																							10.5968		10.15
																							11.3013		1.03
																							5.16581		19.264
																							1.21548		9.714
																							10.3161		5.778
																							4.69355
																							10.1052
