# Supplementary material for: A circuit-dependent ROS feedback loop mediates glutamate excitotoxicity to sculpt the Drosophila motor system
Source: eLife. 2019 Jul 18;8:e47372. doi: 10.7554/eLife.47372 (PMC6682402; doi:10.7554/eLife.47372)
Supplement: Figure 7—source data 1. [file elife-47372-fig7-data1.xlsx]

## Sheet: 工作表1
Figure 7 Panel K (normalized bouton number)																							Figure 7 Panel M (Normalized RFP/GFP)			Figure 7 Panel N (Quantal content)				Figure 7 Panel O (> 15 s bursts (s/min))				Figure 7 Panel P (Locomotion (mm/min))
control (w1118)	cha-GAL4/+ in eaat1hypo	UAS-hSOD1/+ in eaat1hypo	cha>hSOD1 in eaat1hypo	eaat1hypo	2 mM 4-AP eaat1hypo	C57-GAL4/+ in eaat1hypo	C57>hSOD1 in eaat1hypo	nSyb-GAL4/+ in eaat1hypo	nSyb>hSOD1 in eaat1hypo	eaat1hypo	15 mg/ml AD4 eaat1hypo	OK371-GAL4/+ in eaat1hypo	OK371>hSOD1 in eaat1hypo	D42-GAL4/+ in eaat1hypo	D42>hSOD1 in eaat1hypo	eaat1hypo	bsk2/+ in eaat1hypo	kay1/+ in eaat1hypo	jraIA109/+ in eaat1hypo	UAS-fosDN/+ in eaat1hypo	D42>fosDN in eaat1hypo		D42>mitotimer	D42>mitotimer in eaat1hypo		control (w1118)	eaat1hypo	D42>fosDN in eaat1hypo		control (w1118)	eaat1hypo	D42>fosDN in eaat1hypo		eaat1hypo	D42>fosDN in eaat1hypo
0.776876	0.852315	1.30405	0.649175	1.69566	0.698496	1.1242	0.816252	0.817487	0.806766	1.69566	1.0162	1.10096	0.81958	0.927973	0.610344	1.69566	0.828265	0.895215	1.0936	0.79493	0.681939		1.17684	1.26646		11.1994	18.2395	9.46442		0	34.4888	16.1911		6.11018	4.80962
0.851198	1.1	1.41817	0.841836	1.6242	0.778688	1.14236	0.8379	1.12016	0.809483	1.6242	1.05386	1.16321	0.866631	1.10463	0.913293	1.6242	0.911327	0.958411	1.26158	0.953404	0.687566		0.87513	1.93627		18.8836	26.1452	12.7205		0	12.6723	1.70099		19.7258	7.55511
0.854086	1.1531	1.43806	0.858067	1.7524	1.14608	1.20616	0.846529	1.18073	0.919923	1.7524	1.12225	1.19859	0.937919	1.20951	0.970048	1.7524	1.026	0.986401	1.29767	0.98871	0.706697		0.962688	1.76922		16.126	33.2597	13.5026		0	13.4981	3.22357		2.20367	13.9712
0.875728	1.2057	1.44126	1.05073	1.59773	1.19347	1.21437	0.847823	1.25408	1.0048	1.59773	1.13526	1.28265	1.03182	1.28347	0.99993	1.59773	1.05245	1.10971	1.46239	1.05468	0.708314		0.963751	1.53069		12.4589	15.5637	20.7613		0	19.0245	8.59022		4.98998	5.07862
0.904841	1.31076	1.48481	1.07761	1.58806	1.22463	1.23624	0.884905	1.36534	1.08624	1.58806	1.16522	1.39788	1.03692	1.37242	1.03352	1.58806	1.13203	1.24686	1.50156	1.14705	0.736638		0.89676	1.79657		7.4388	17.9118	4.66328		0	47.8416	2.33567		6.92462	9.91636
0.931889	1.33177	1.49626	1.08382	2.26199	1.23439	1.24734	1.08796	1.36702	1.1113	2.26199	1.19714	1.44975	1.13271	1.4683	1.04531	2.26199	1.1624	1.2746	1.59049	1.23948	0.738835		1.06158	1.92732		11.7594	23.8132	14.8724		0	3.19297	27.8443		11.0643	4.21405
0.934895	1.36062	1.66172	1.12342	1.04158	1.29716	1.31649	1.09037	1.3844	1.11227	1.04158	1.25563	1.45415	1.16672	1.48944	1.08066	1.04158	1.18233	1.29779	1.93103	1.28924	0.751007		1.1365	2.21415				19.7865		0.4	1.52196	16.0255		2.38956	14.2676
0.960424	1.37253		1.46743	1.85613	1.3274	1.32024	1.1154	1.41752	1.1202	1.85613	1.26379	1.52957	1.17395	1.49471	1.09125	1.85613	1.19552	1.36489	1.95284	1.34858	0.775578		0.993466	2.0676				8.10329		0	25.0268	14.5809		9.47474	11.2776
0.963456	1.38619			1.56359	1.37697	1.45907	1.11657	1.44125	1.24413	1.56359	1.28975	1.65676	1.29618	1.50792	1.09711	1.56359	1.20875	1.38481	2.23248	1.3981	0.777678		1.1018	1.90695								45.3243		15.2359	13.3556
0.967974	1.4787			2.01005	1.41615	1.48233	1.12192	1.45232		2.01005	1.34777	1.70763	1.3267	1.51107	1.17097	2.01005	1.50211	1.50503	2.45065	1.42829	0.799891		0.831486	1.94521										3.56356	7.25936
0.984197	1.48078			1.91071	1.48246	1.63611	1.1284	1.48121		1.91071	1.37136	1.722	1.36039	1.51606	1.18033	1.91071				1.43114	0.968775													21.7818	16.9051
0.99044	1.79924			1.52132	1.58033	1.6837	1.14658	1.48517		1.52132	1.3957	1.76567		1.55571	1.20259	1.52132				1.46447														5.90591	10.5351
1.02315				1.00897	1.58555	1.70674	1.21166	1.51545		1.00897	1.63894			1.56941	1.21088	1.00897				1.54376														22.2771	2.77016
1.03365				1.58972	1.67457	1.88488	1.31719	1.58551		1.58972				1.57913	1.21994	1.58972				1.5826														35.1386	4.57678
1.05364				1.27238		1.92964	1.36667	1.60755		1.27238				1.65718	1.32779	1.27238				1.78828														5.24875	1.00368
1.06552				0.889458		1.94488	1.54518	1.63454		0.889458				1.70854	1.33591	0.889458				1.86454														0	4.53663
1.06788				0.936487			1.63395	1.6429		0.936487				1.71627		0.936487																		0	4.92328
1.07129				2.01029			1.68675	1.65028		2.01029				1.84157		2.01029																		0	6.1441
1.0935				2.16722				1.72046		2.16722				1.98178		2.16722																		1.70626	6.86458
1.09803				1.94278				1.78194		1.94278						1.94278																		1.58581	2.002
1.10855																																			9.16917
																																			3.26326
