# Supplementary figures and images for: A circuit-dependent ROS feedback loop mediates glutamate excitotoxicity to sculpt the Drosophila motor system
Source: eLife journal article supplement (doi:10.7554/elife.47372), 2019-07-18

Figure 1-figure supplement 1

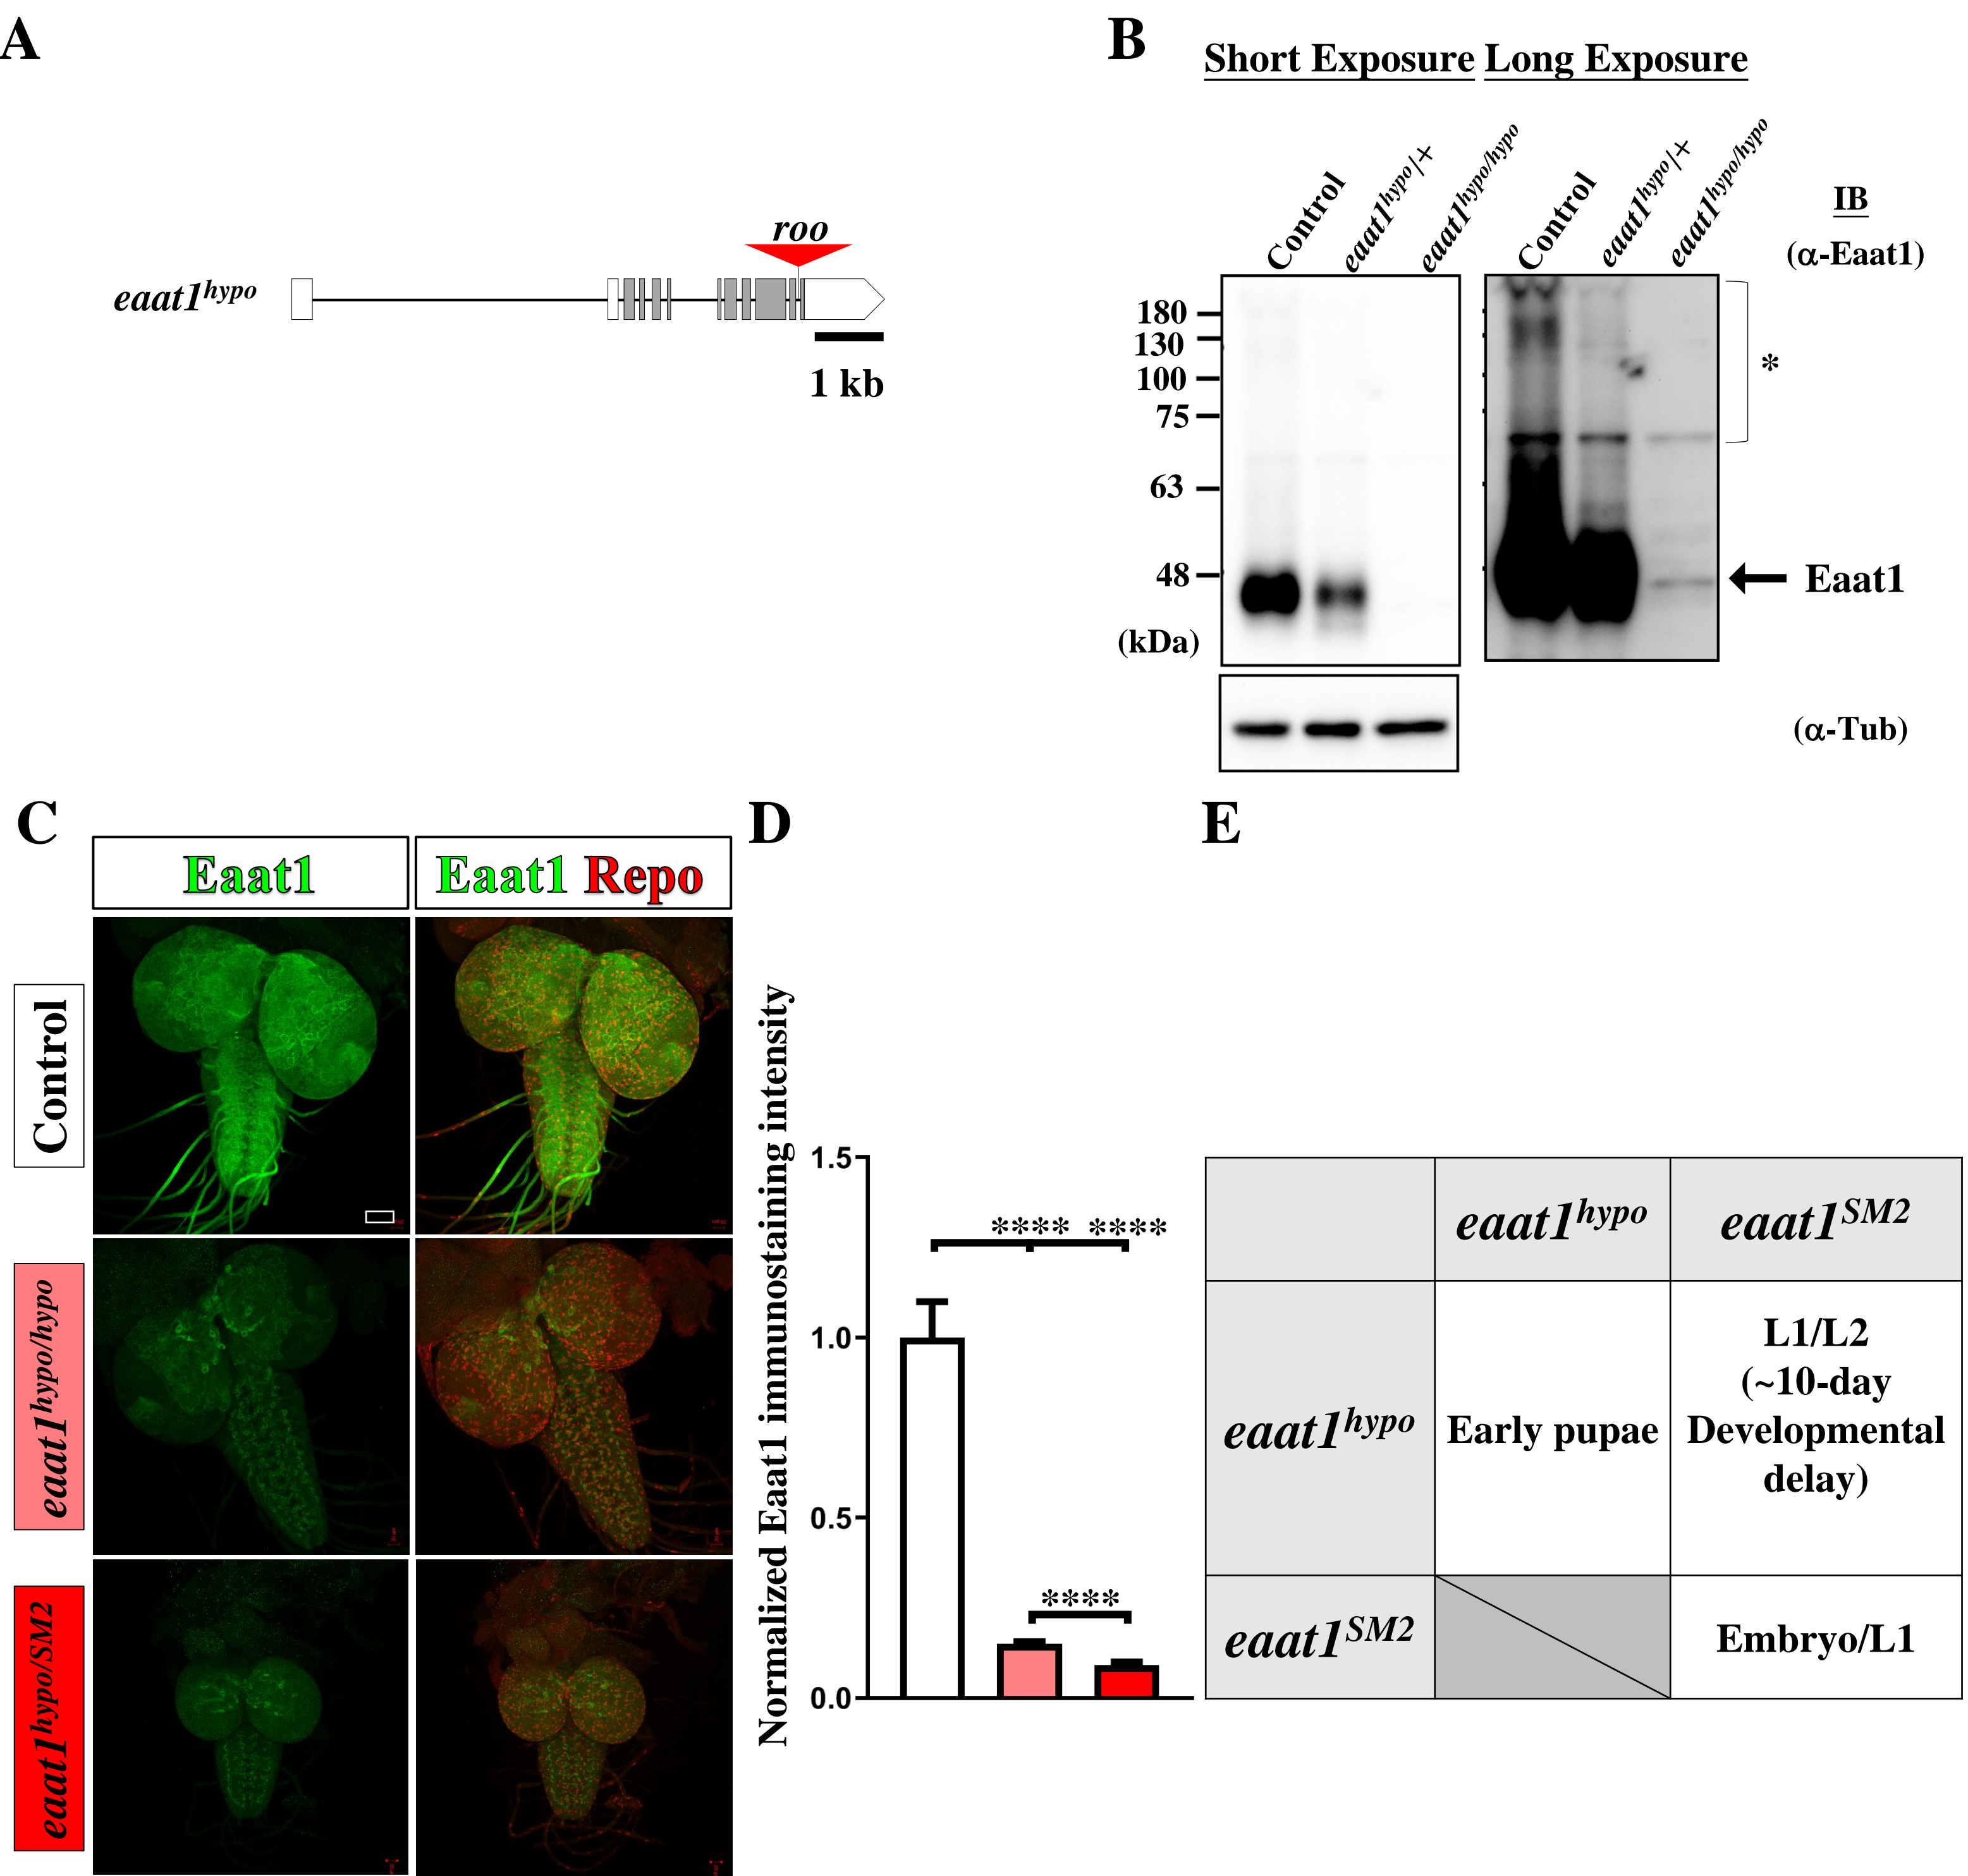

Supplement: supp [file elife_poa_e47372_Figure_1_figure_supplement_1.pdf › elife_poa_e47372_Figure_1_figure_supplement_1.pdf]

**Figure 1-figure supplement 2**

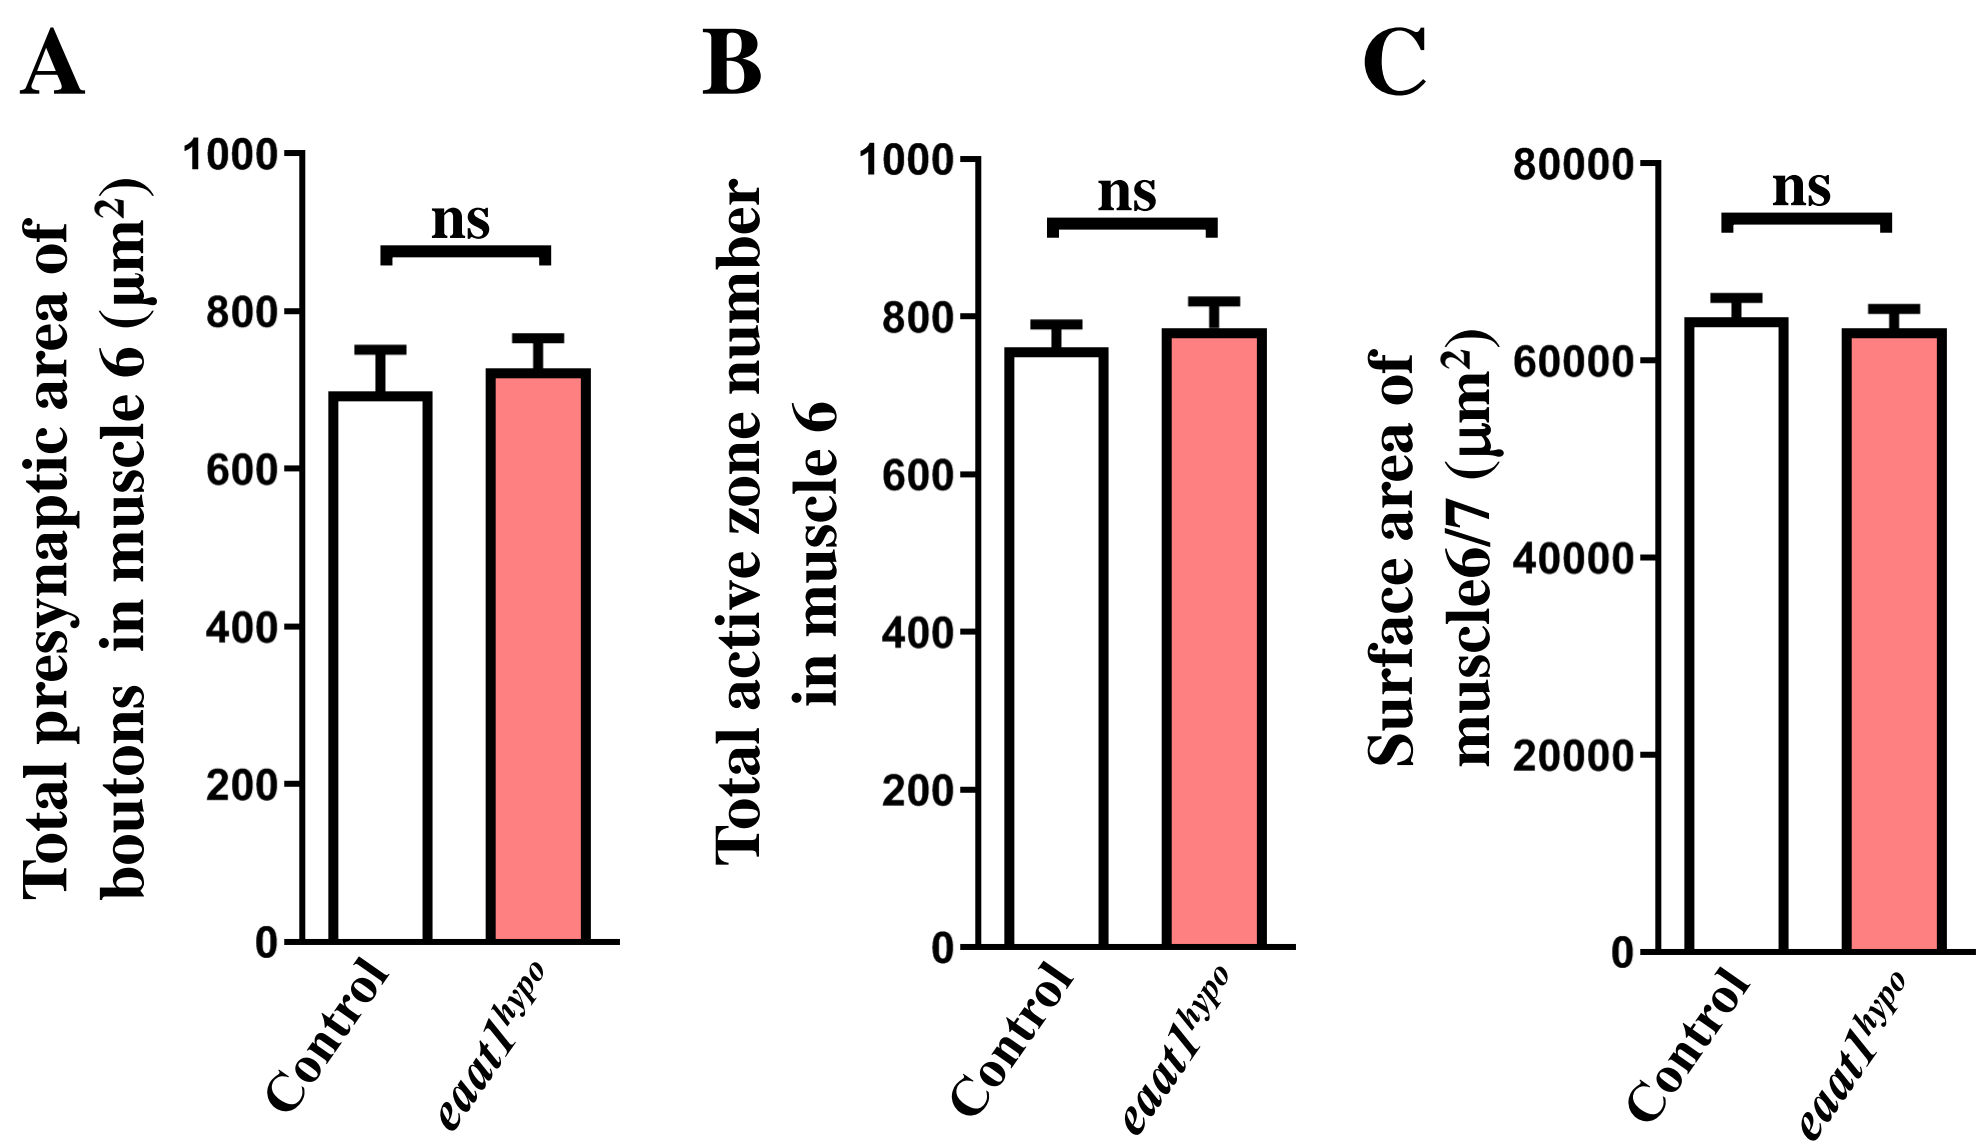

Supplement: supp [file elife_poa_e47372_Figure_1_figure_supplement_2.pdf › elife_poa_e47372_Figure_1_figure_supplement_2.pdf]

Figure 1-figure supplement 3

A

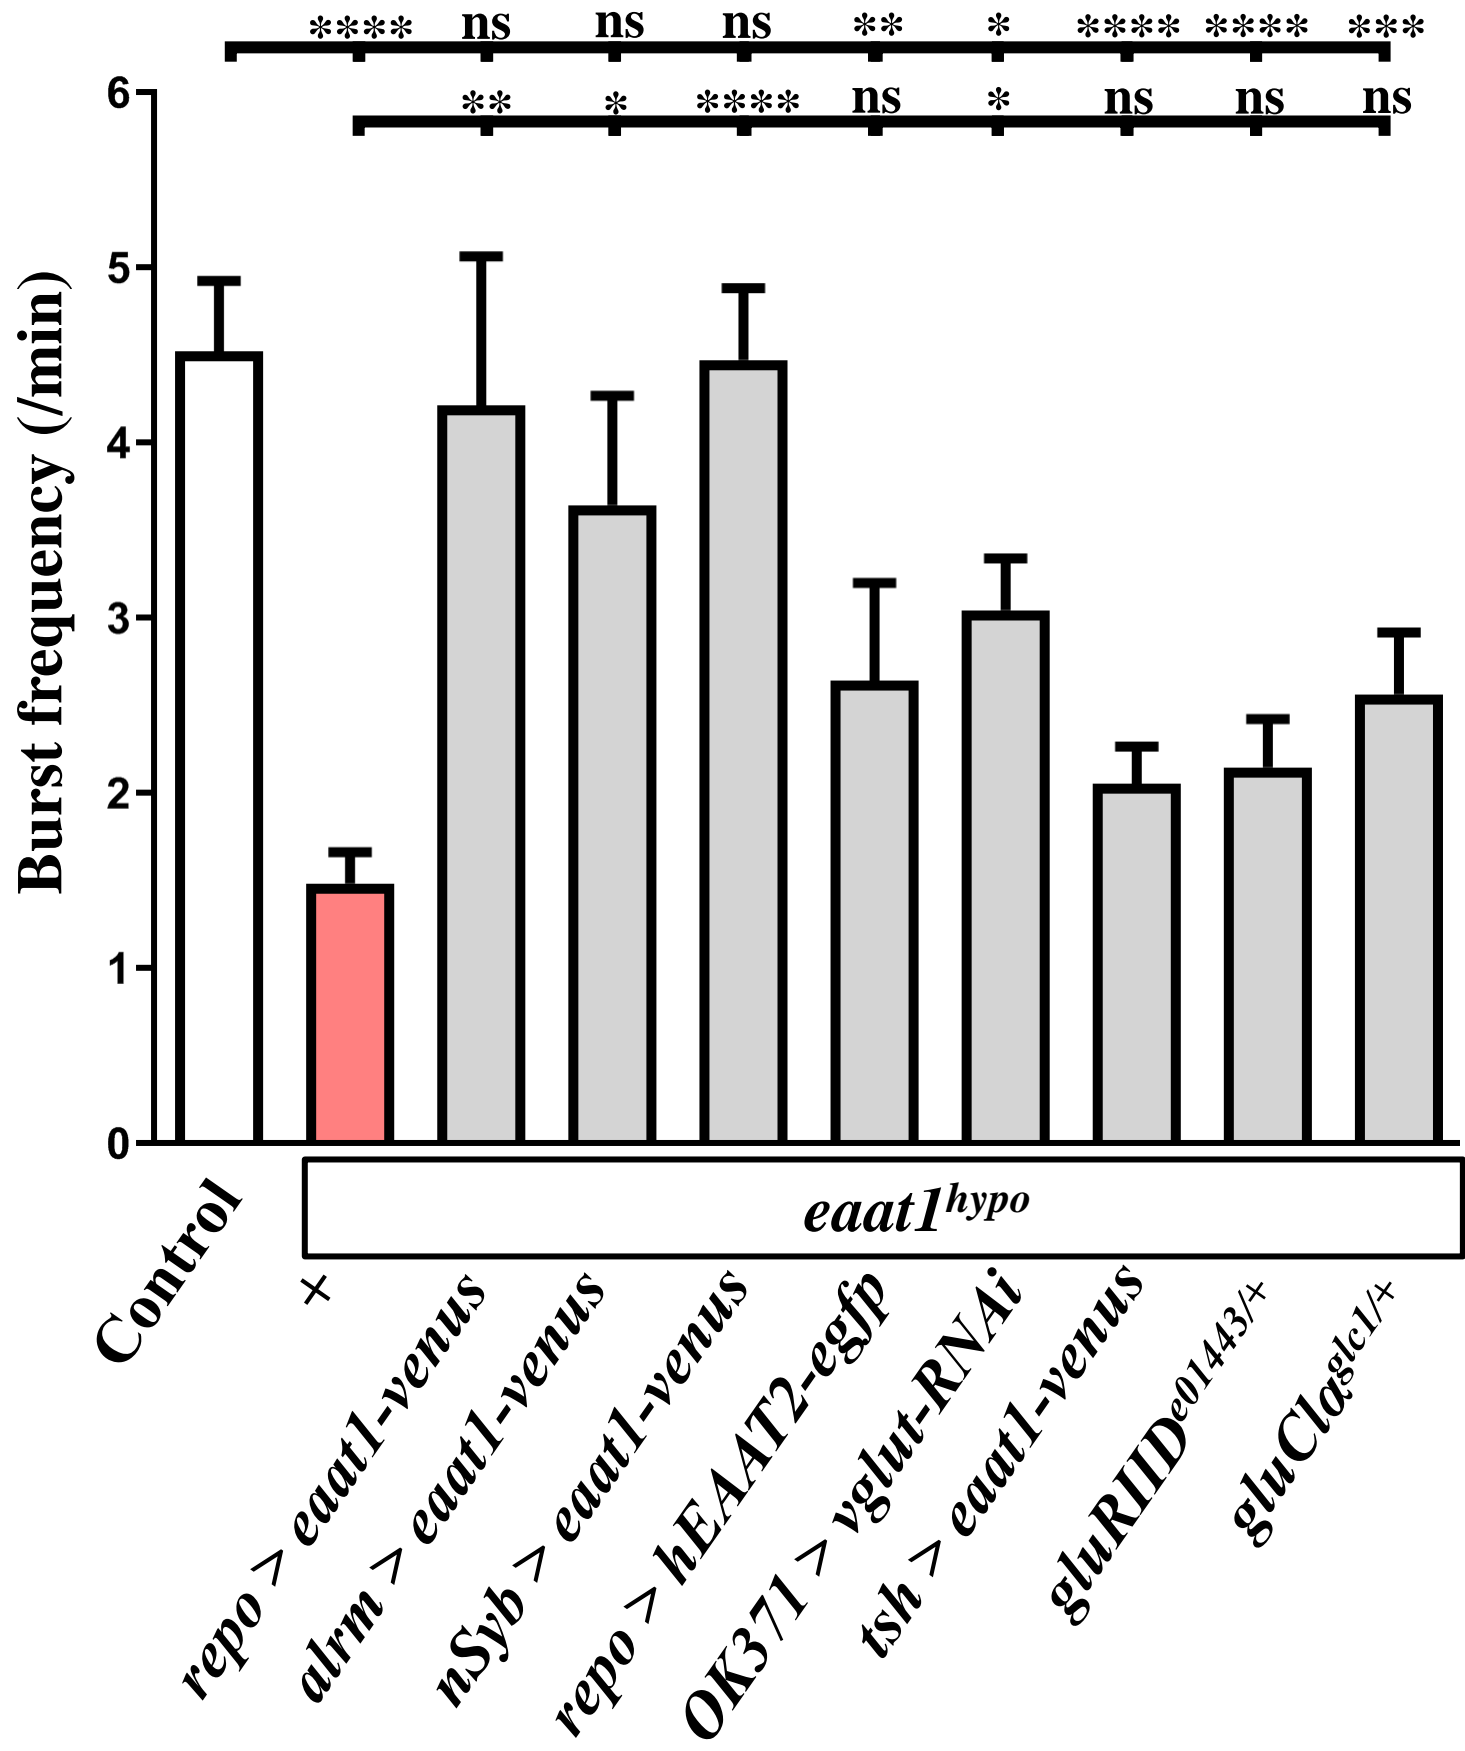

B

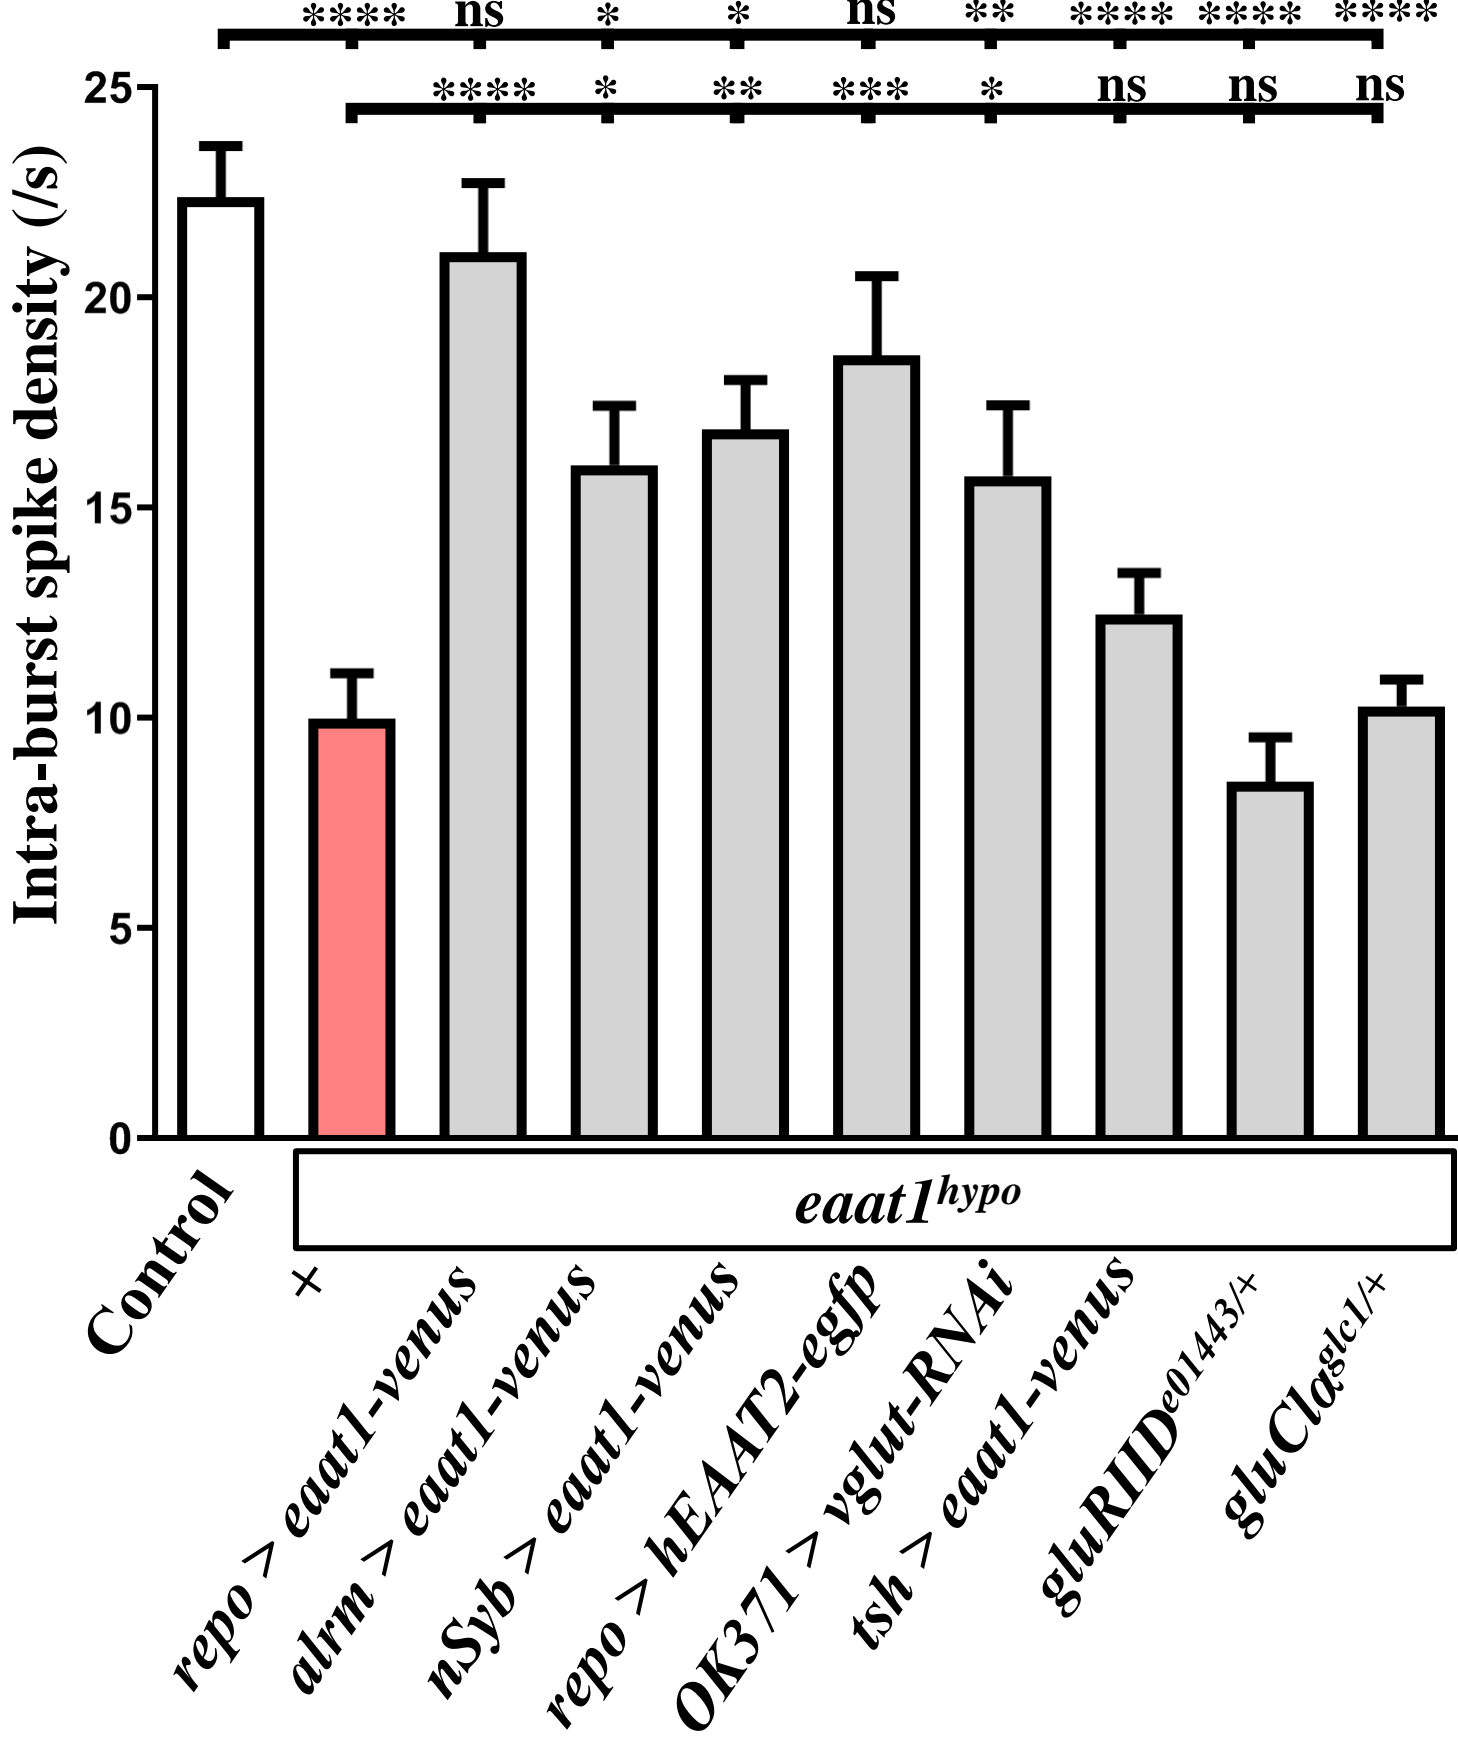

Supplement: supp [file elife_poa_e47372_Figure_1_figure_supplement_3.pdf › elife_poa_e47372_Figure_1_figure_supplement_3.pdf]

Figure 2-figure supplement 1

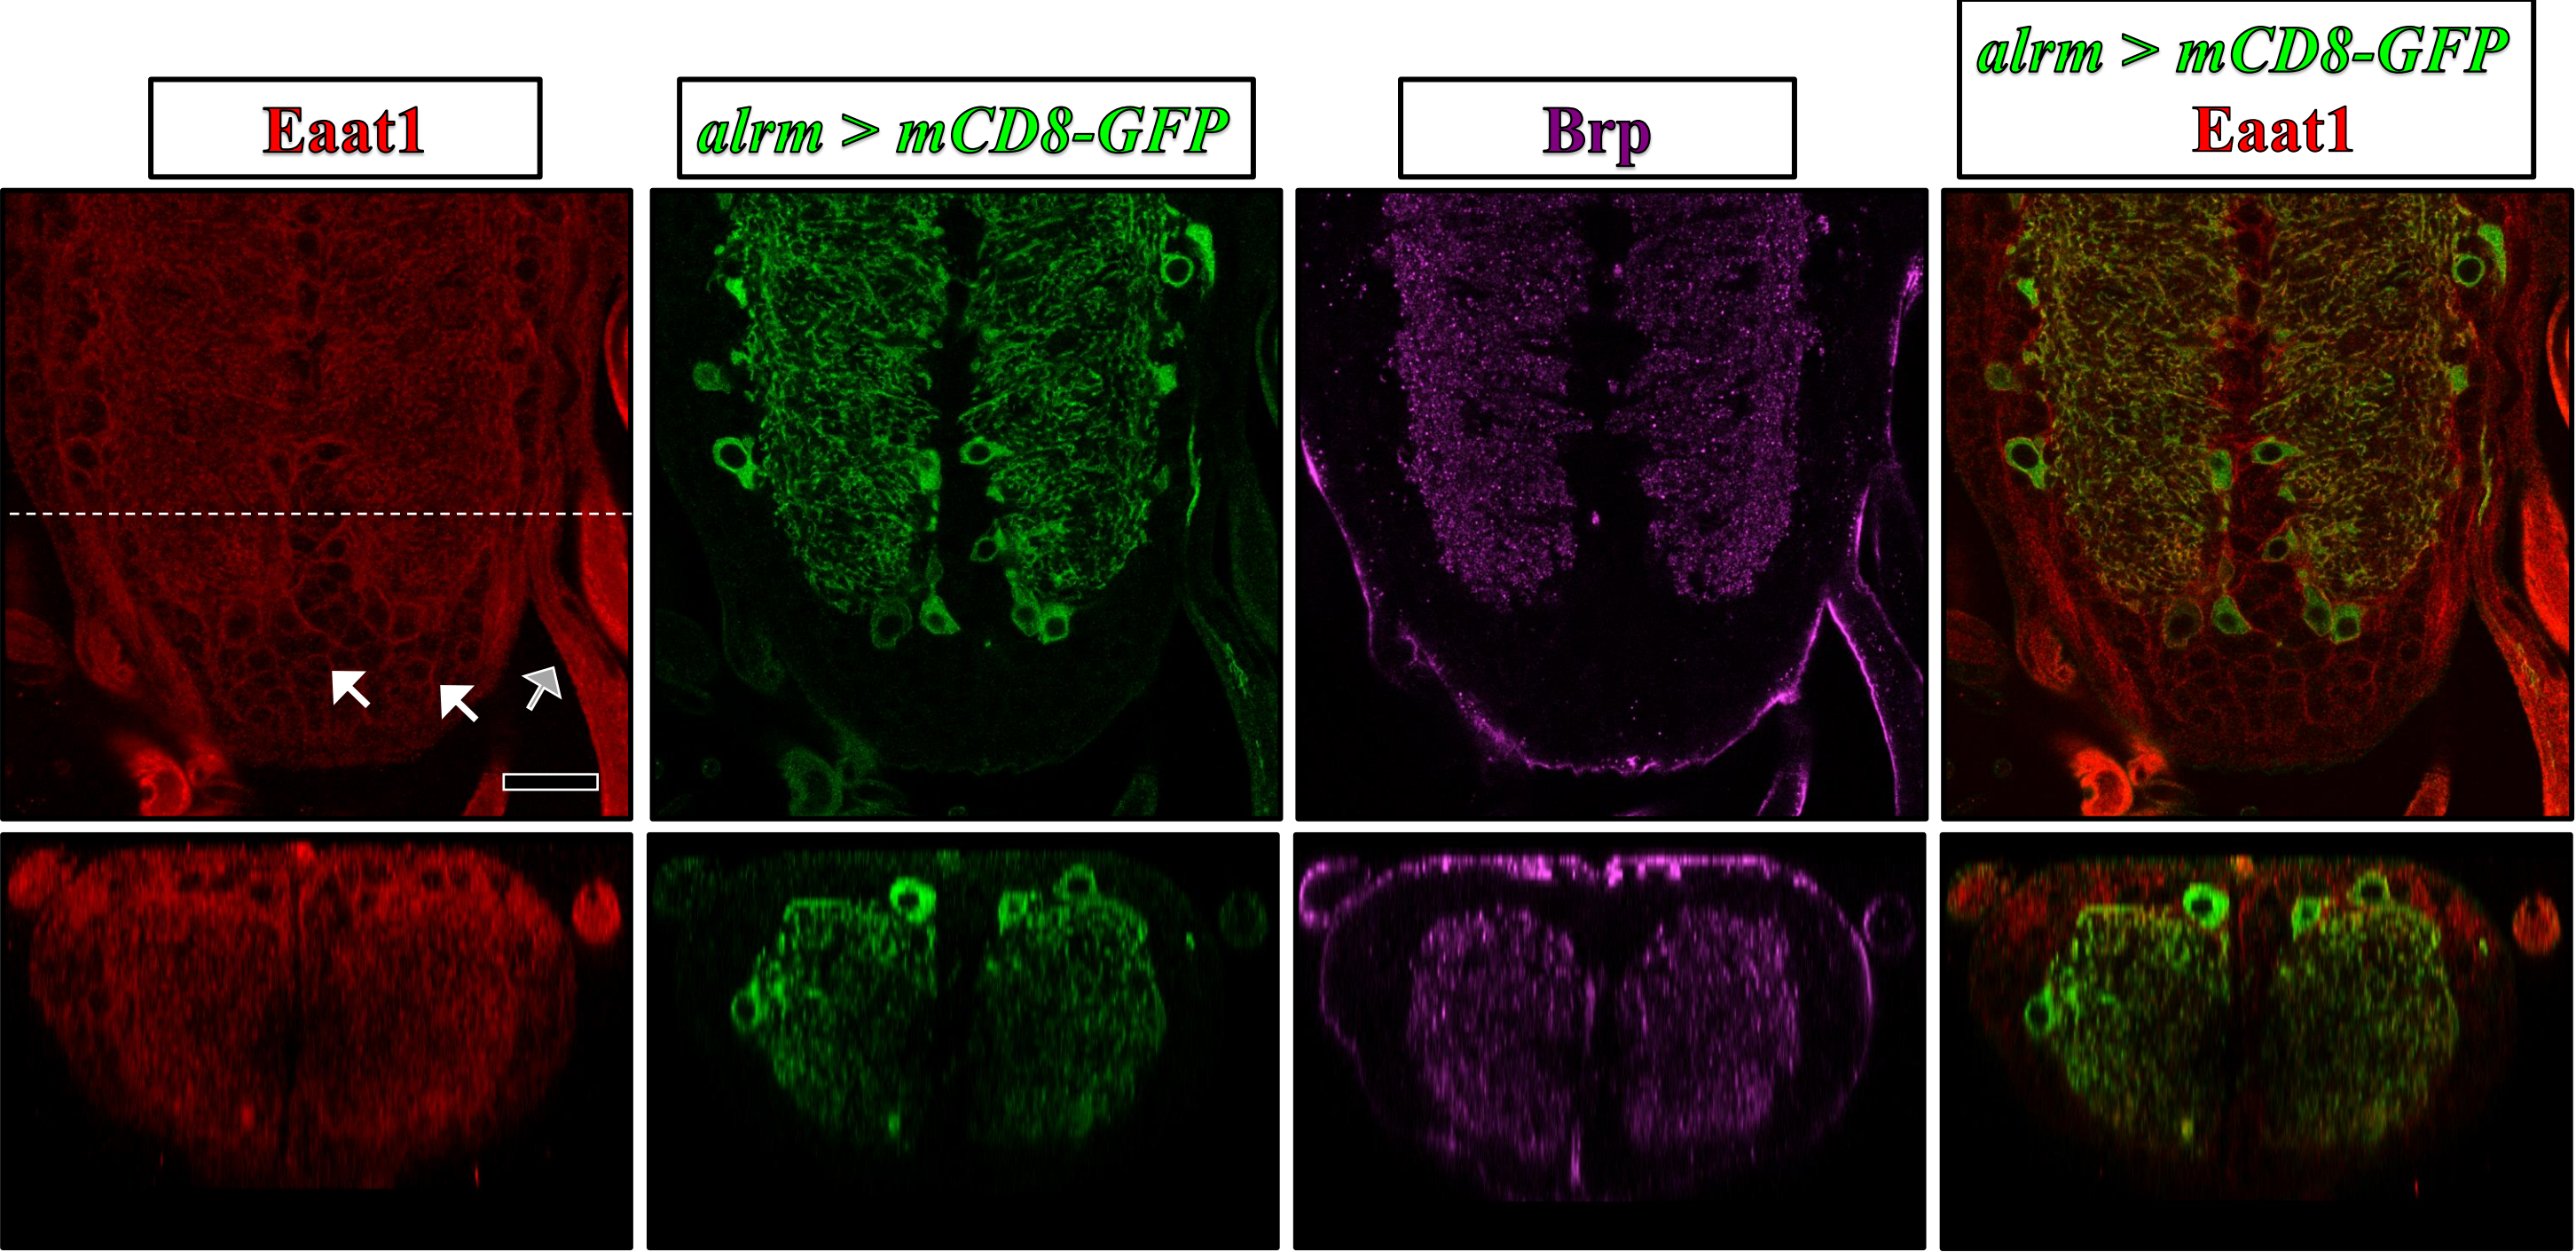

Supplement: supp [file elife_poa_e47372_Figure_2_figure_supplement_1.pdf › elife_poa_e47372_Figure_2_figure_supplement_1.pdf]

Figure 2-figure supplement 2

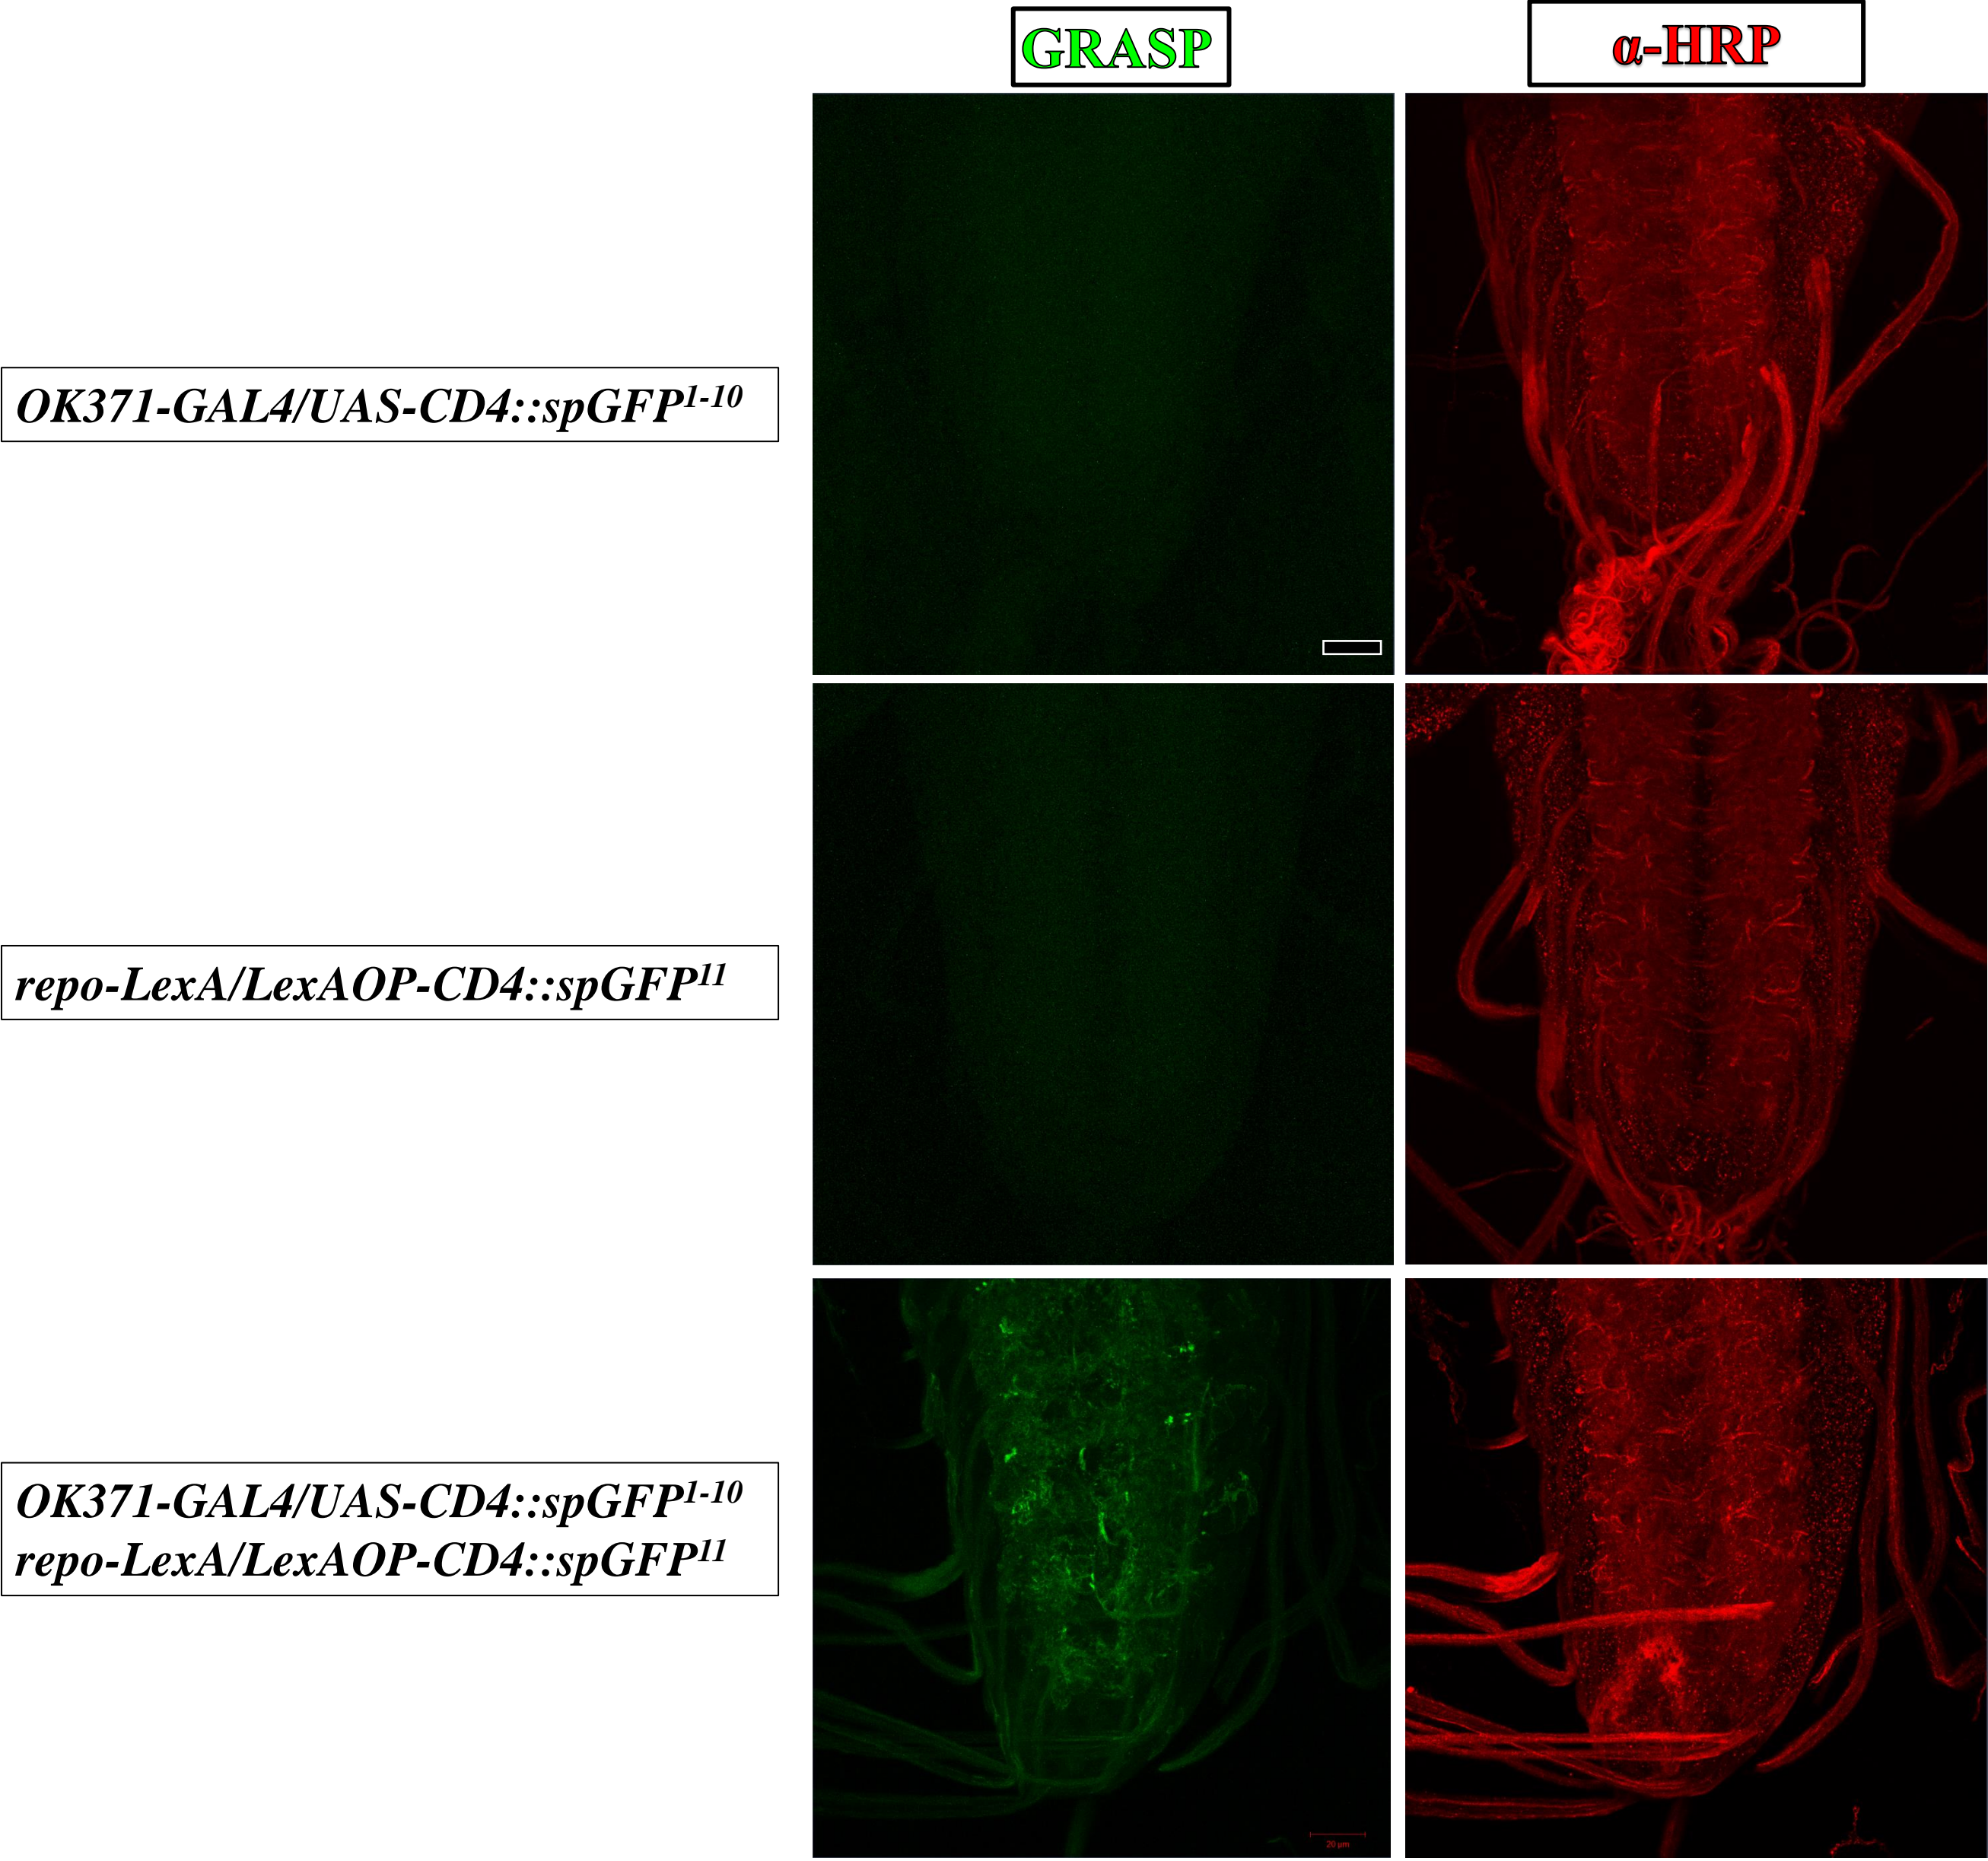

Supplement: supp [file elife_poa_e47372_Figure_2_figure_supplement_2.pdf › elife_poa_e47372_Figure_2_figure_supplement_2.pdf]

Figure 2-figure supplement 3

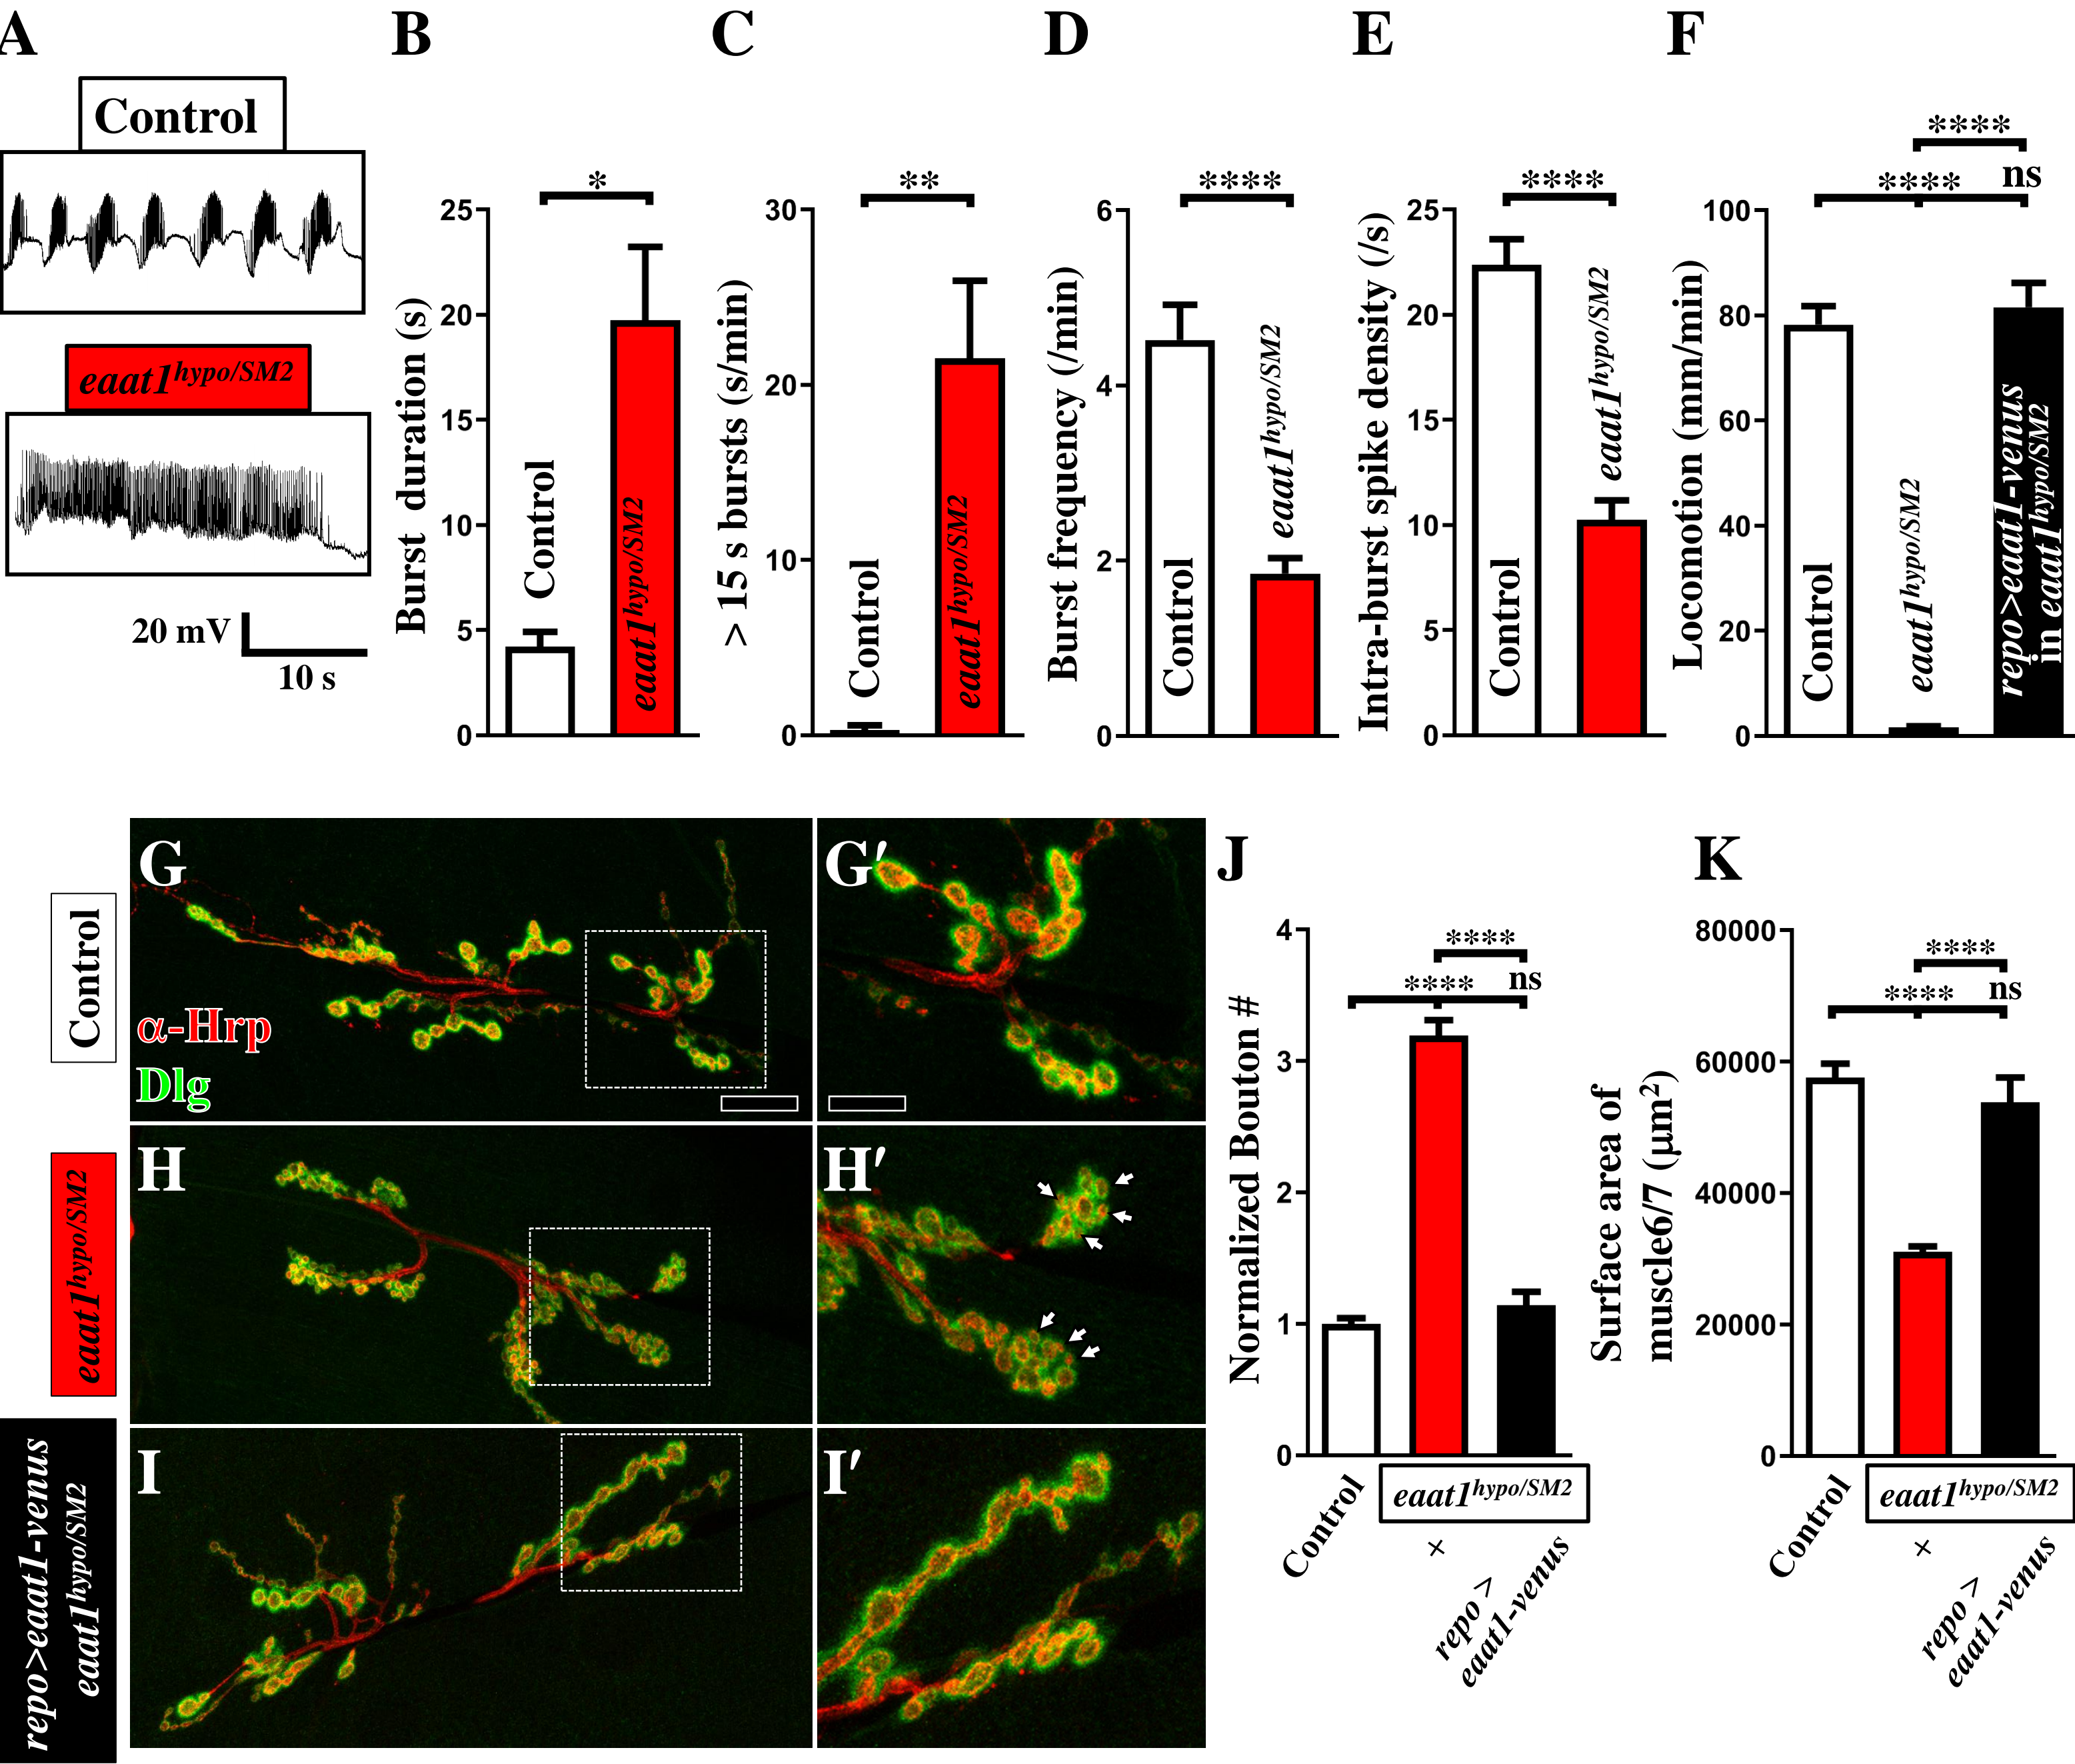

Supplement: supp [file elife_poa_e47372_Figure_2_figure_supplement_3.pdf › elife_poa_e47372_Figure_2_figure_supplement_3.pdf]

Figure 3-figure supplement 1

A

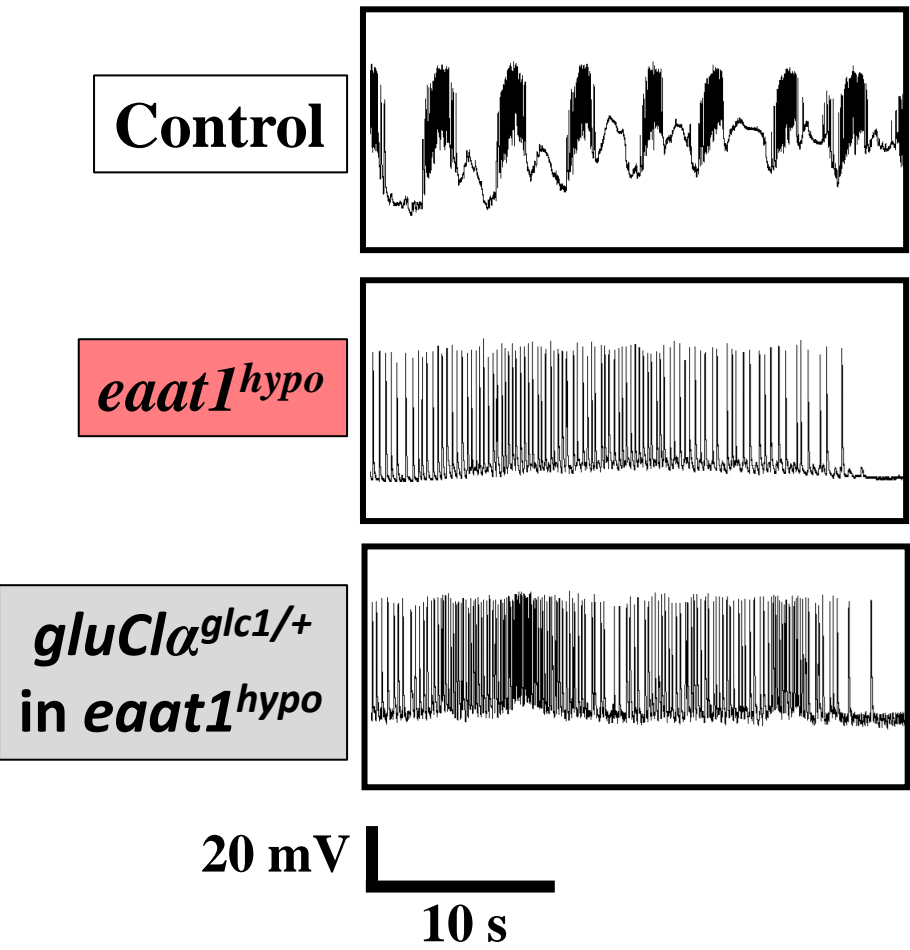

B

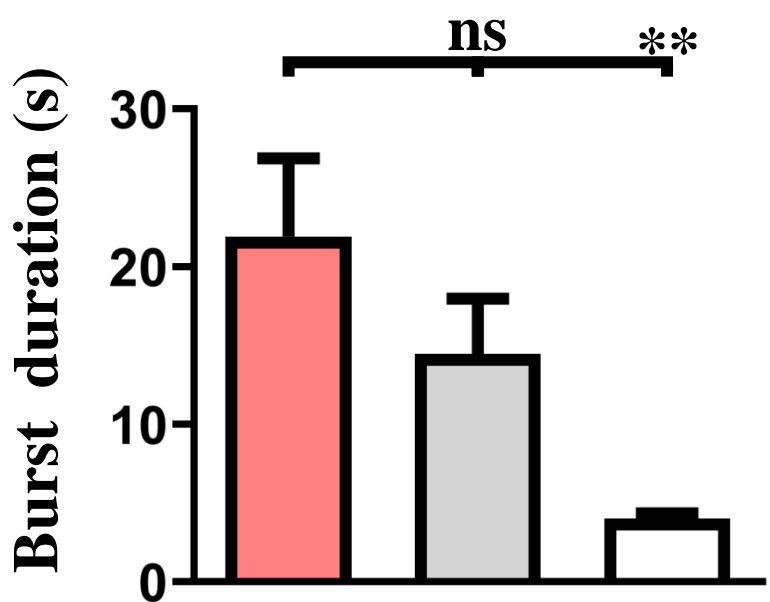

C

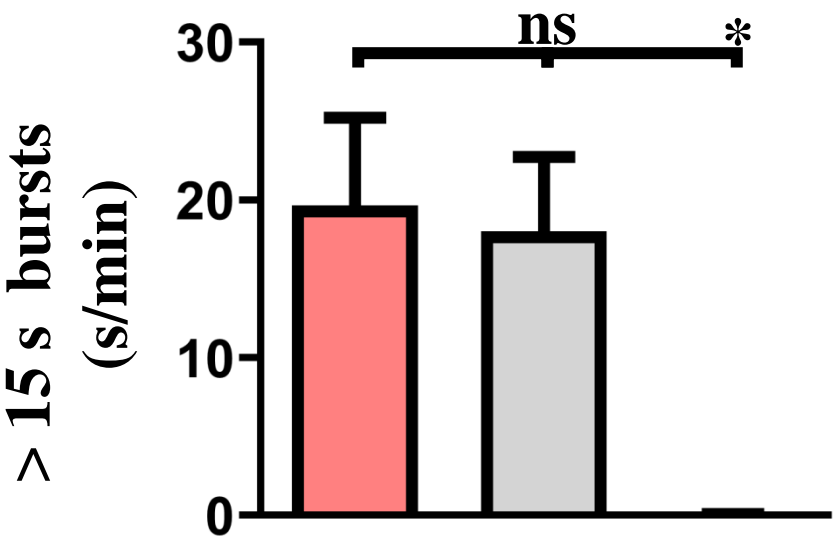

D

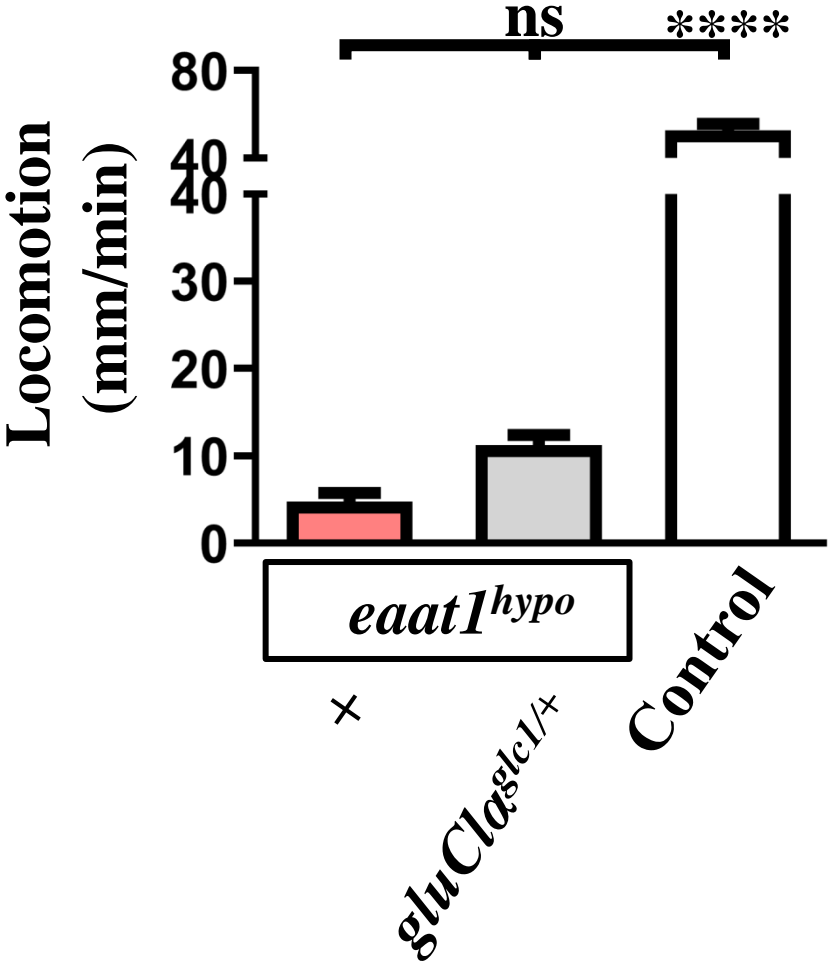

Supplement: supp [file elife_poa_e47372_Figure_3_figure_supplement_1.pdf › elife_poa_e47372_Figure_3_figure_supplement_1.pdf]

Figure 5-figure supplement 1

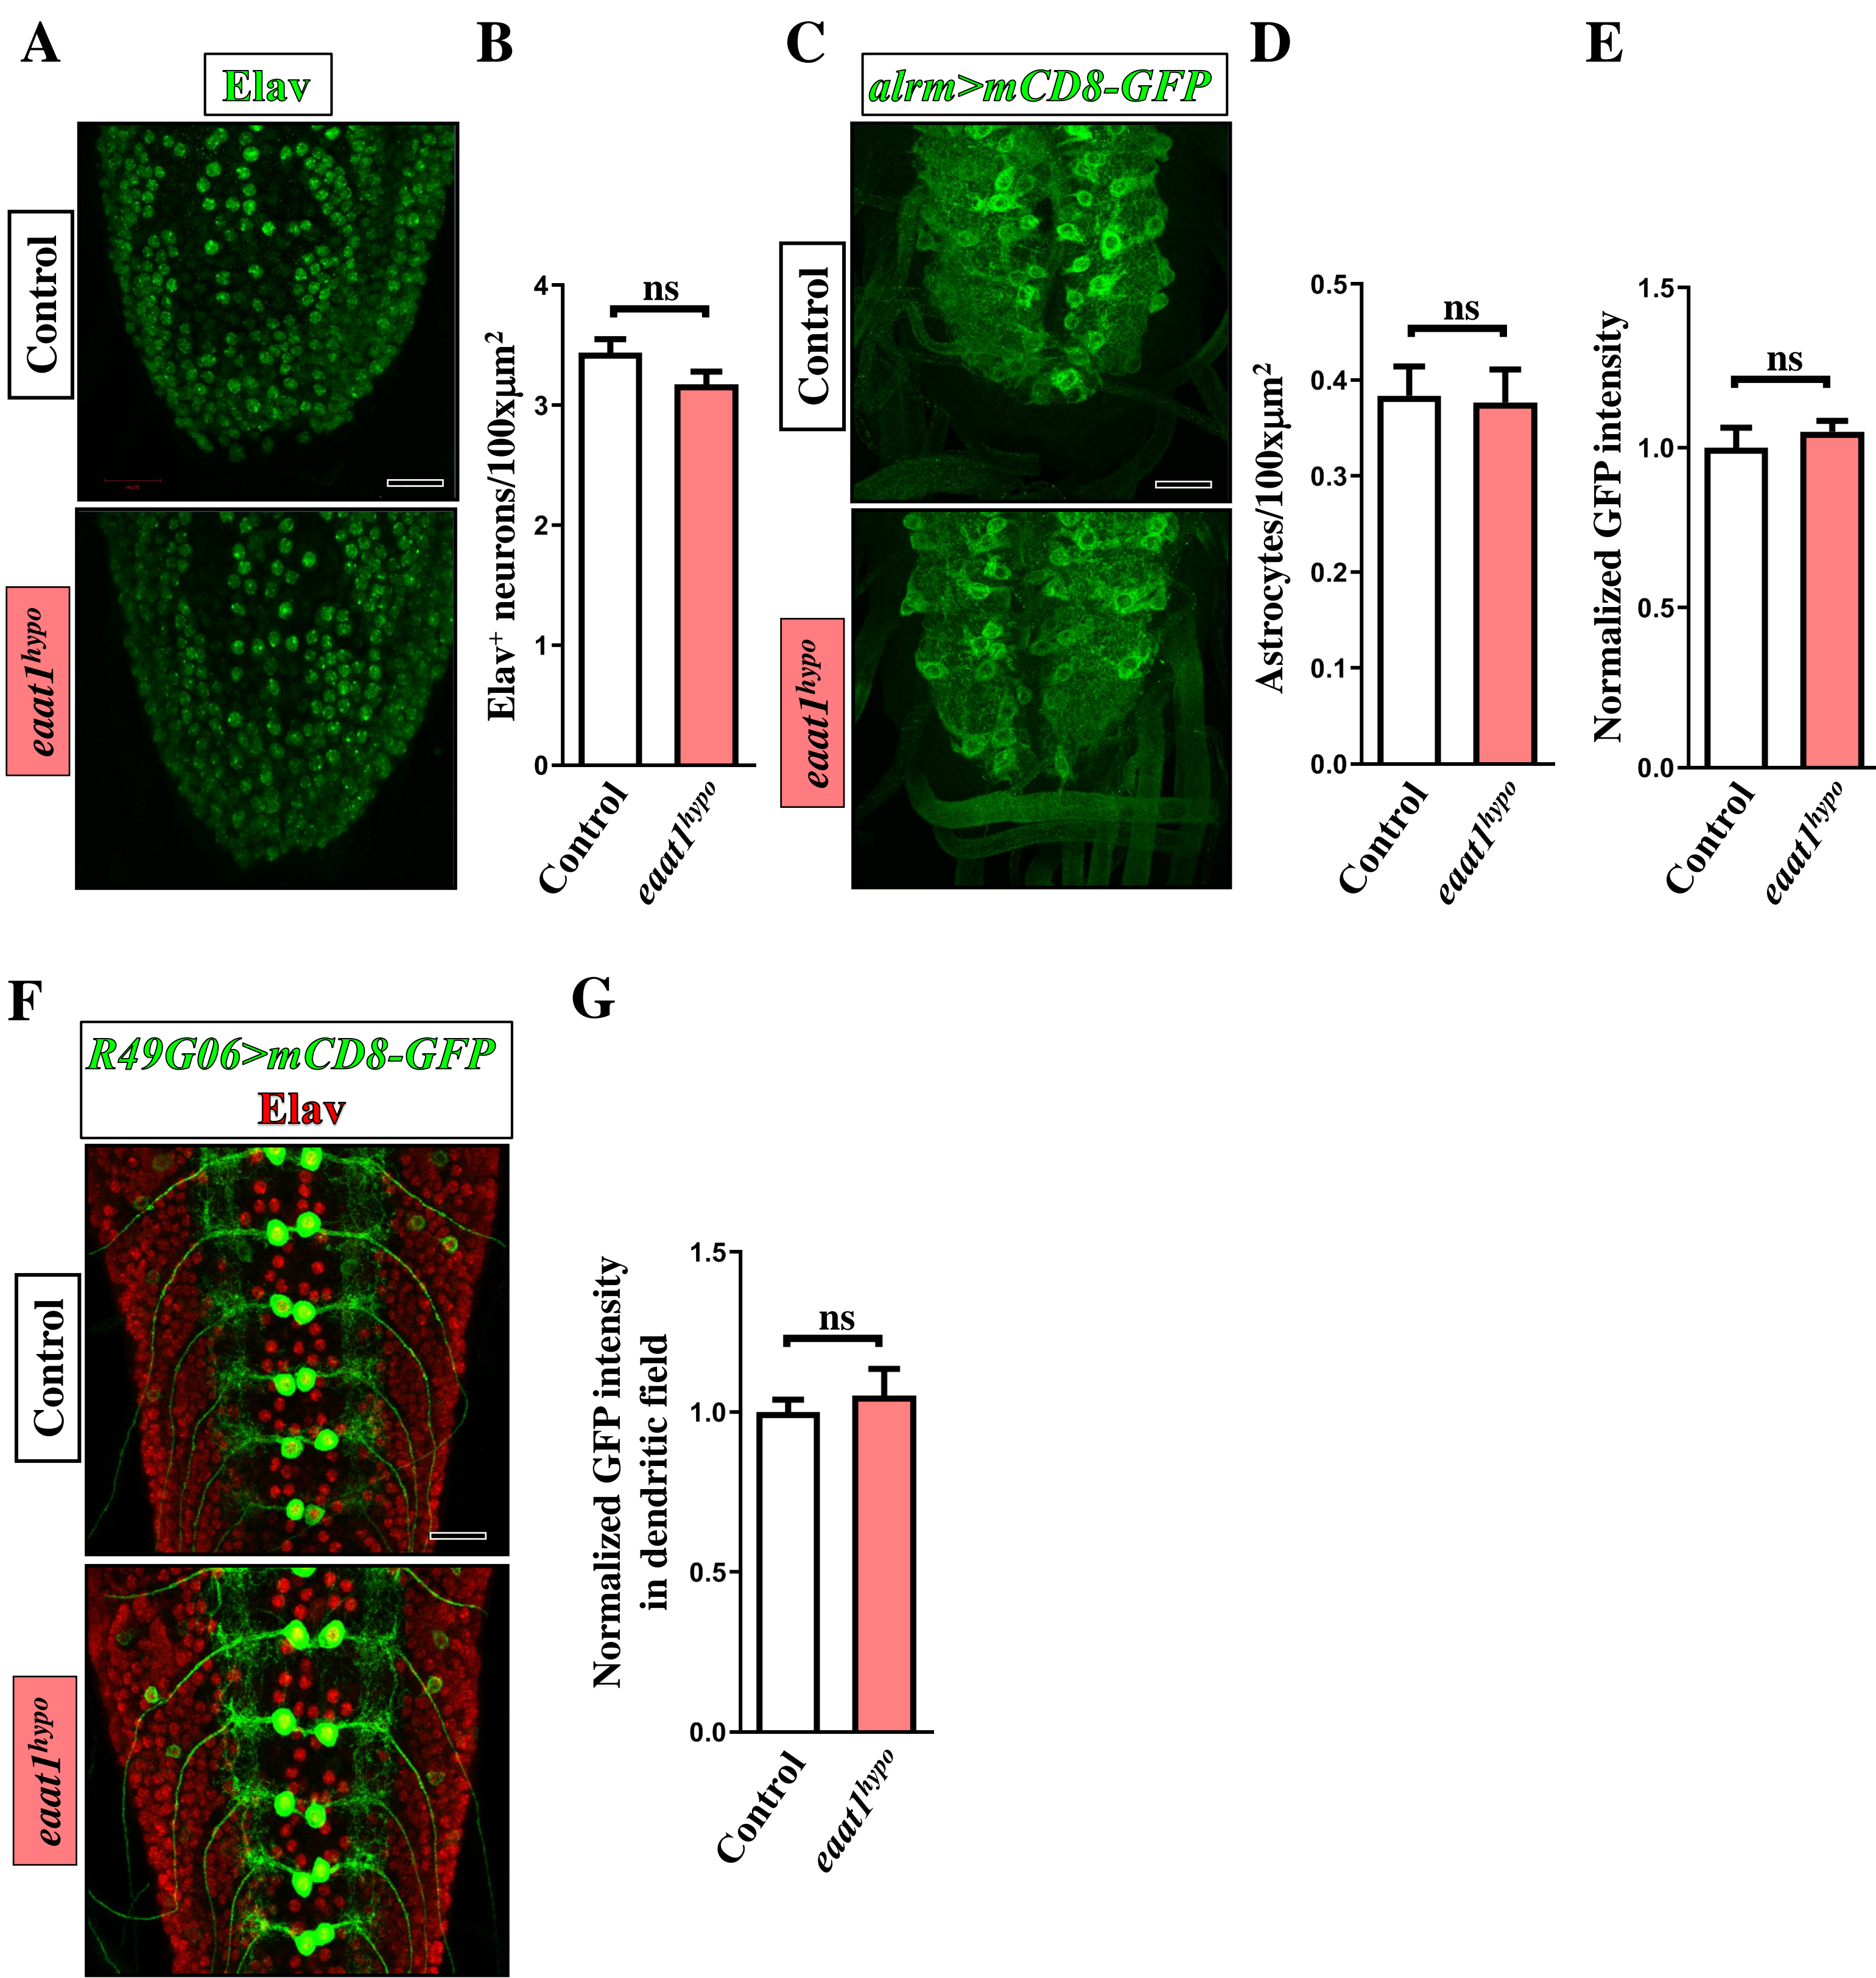

Supplement: supp [file elife_poa_e47372_Figure_5_figure_supplement_1.pdf › elife_poa_e47372_Figure_5_figure_supplement_1.pdf]

## Figure 6-figure supplement 1

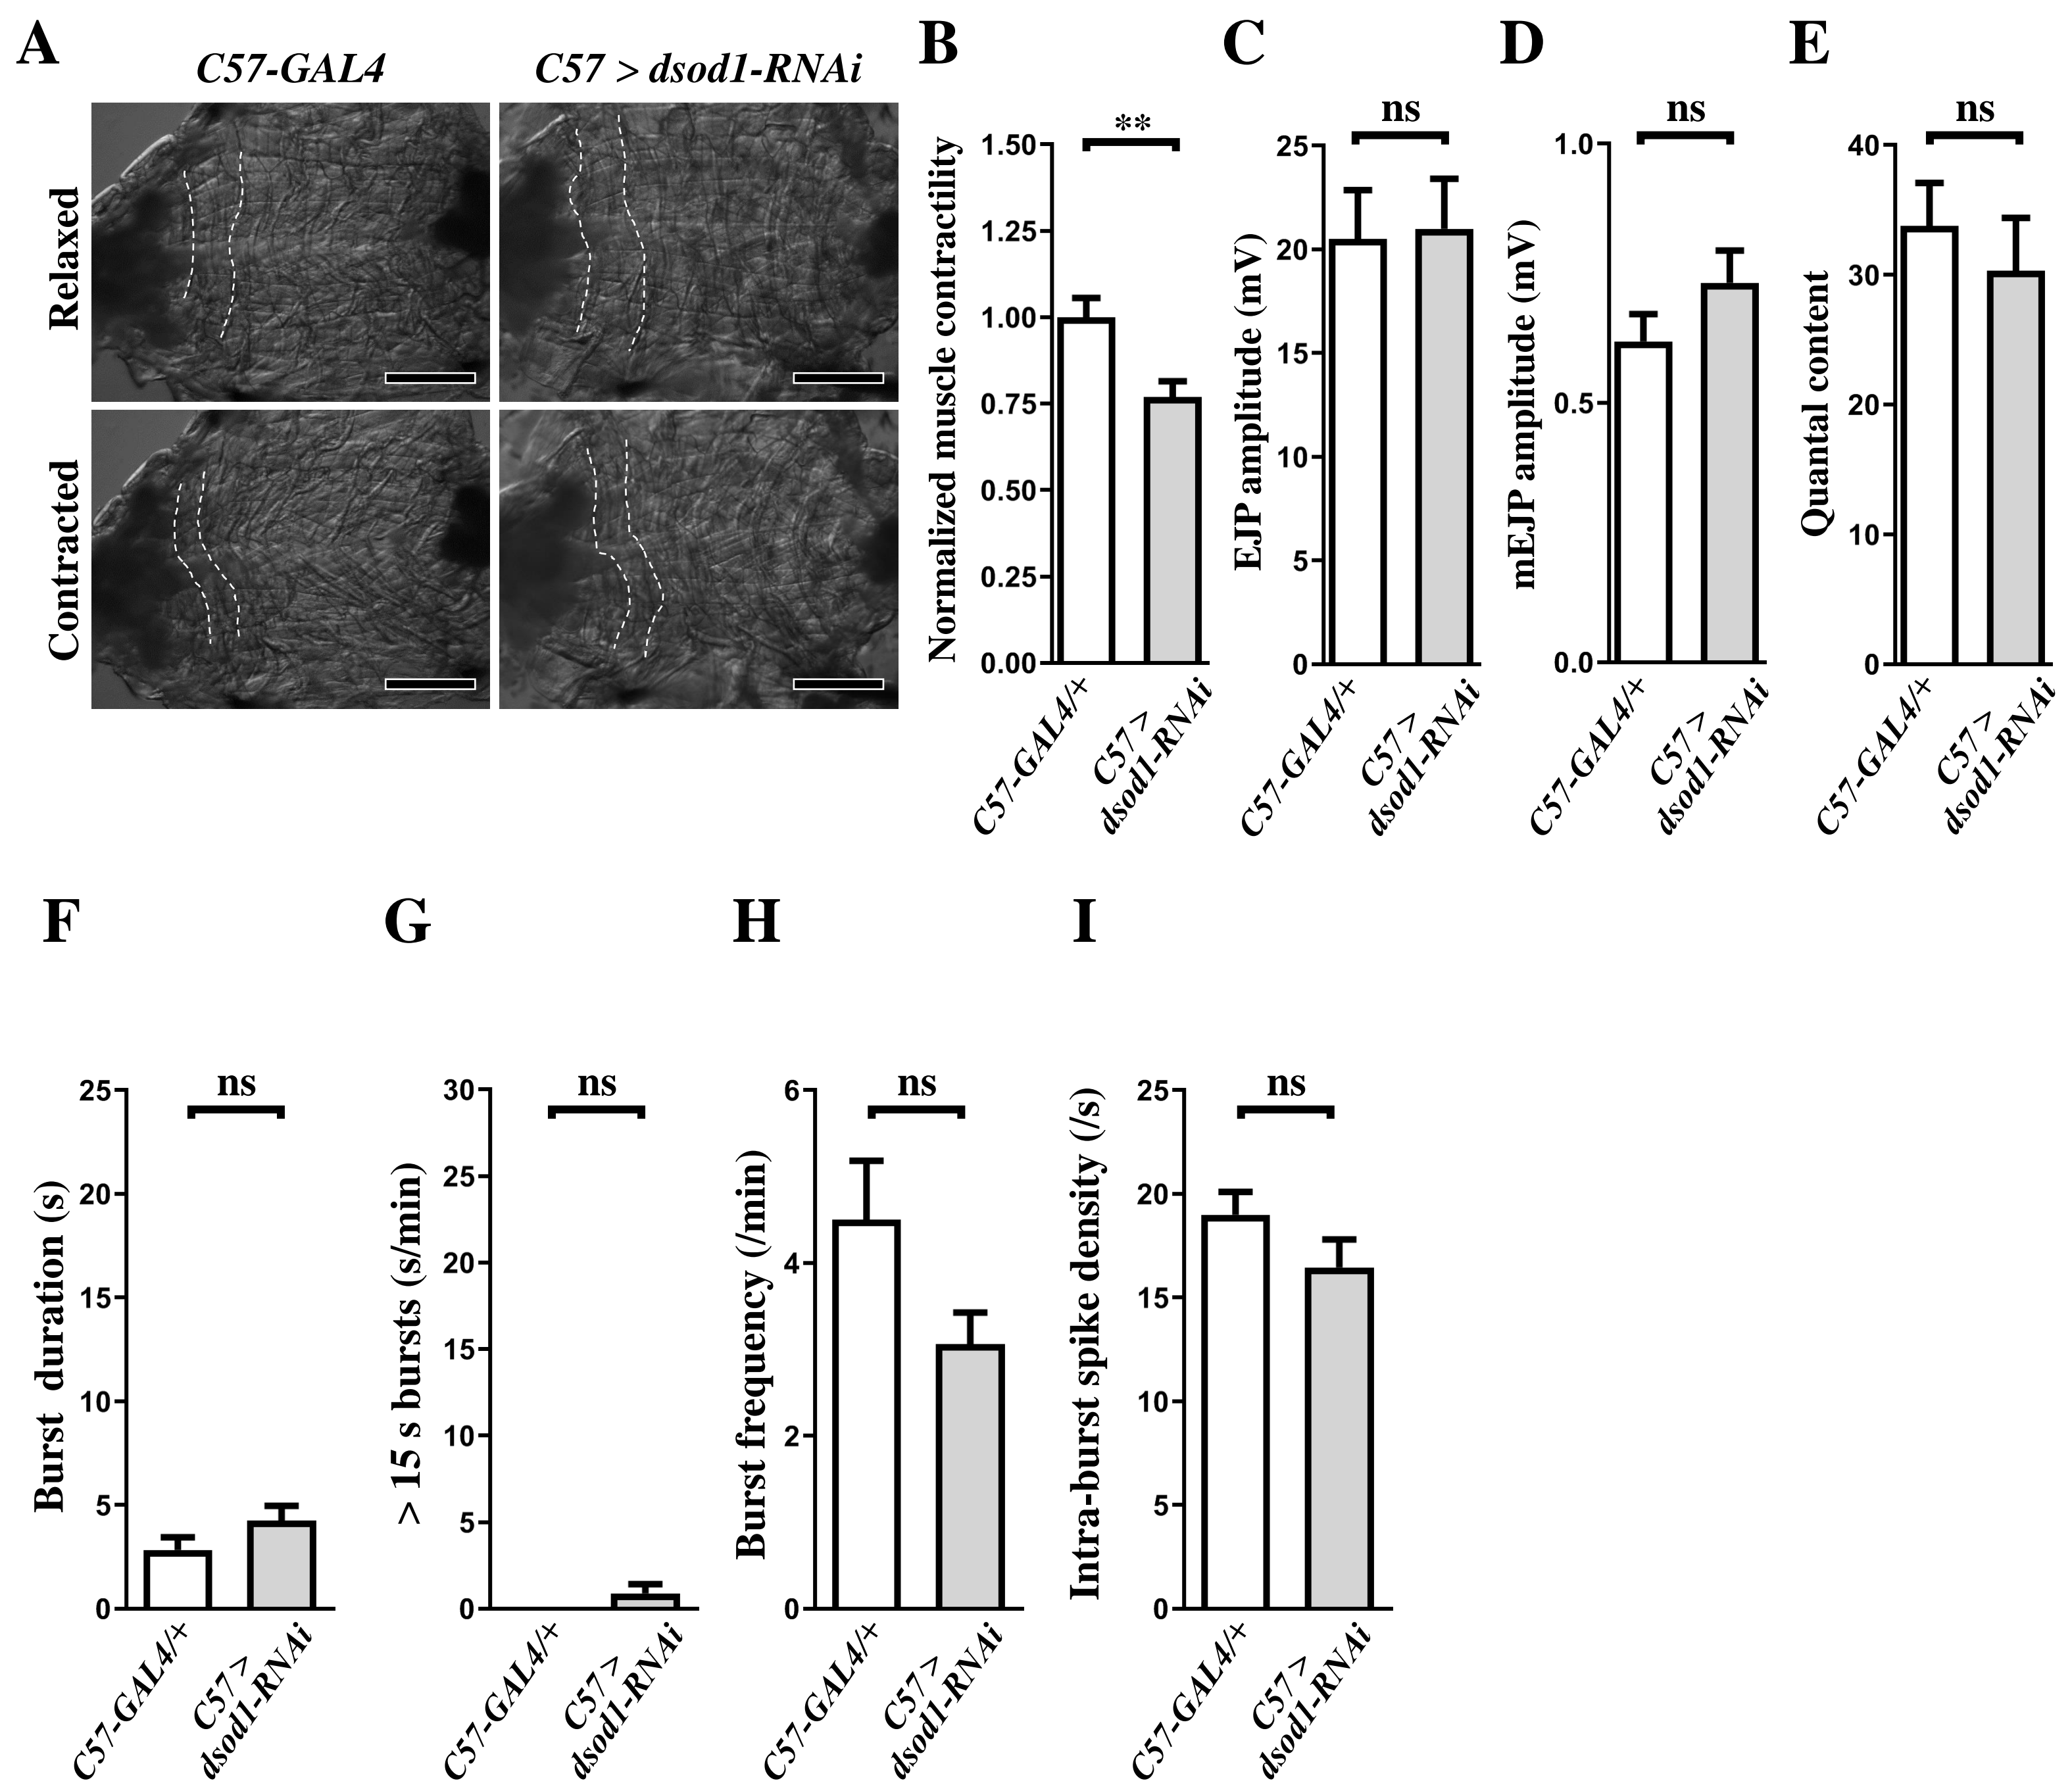

Supplement: supp [file elife_poa_e47372_Figure_6_figure_supplement_1.pdf › elife_poa_e47372_Figure_6_figure_supplement_1.pdf]
